1 **Contrary neuronal recalibration in different multisensory cortical areas**

2 Fu Zeng<sup>1</sup>, Adam Zaidel<sup>2, \*</sup> and Aihua Chen<sup>1, \*</sup>

3 1. Key Laboratory of Brain Functional Genomics (Ministry of Education), East China

4 Normal University, 3663 Zhongshan Road N., Shanghai 200062, China

5 2. Gonda Multidisciplinary Brain Research Center, Bar-Ilan University, Ramat Gan,

6 5290002, Israel

7 \* Co-corresponding author.

8 **Keywords:**

9 cross-modal; plasticity; self-motion; vestibular; visual; adaptation

10 \* Correspondence: [ahchen@brain.ecnu.edu.cn](mailto:ahchen@brain.ecnu.edu.cn) (A.C.) or [adam.zaidel@biu.ac.il](mailto:adam.zaidel@biu.ac.il) (A.Z.)

11 **In Brief:**

12 The neural bases of multisensory plasticity are currently unknown. Here, Zeng et al.  
13 studied neuronal recalibration to a systematic visual-vestibular cue conflict. In  
14 multisensory cortical areas MSTd and PIVC, single-unit responses to visual and vestibular  
15 stimuli recalibrated to reduce the cue conflict, along with their respective unisensory  
16 perceptual shifts. By contrast, in higher-level VIP, both visual and vestibular neuronal  
17 responses recalibrated with vestibular perceptual shifts. This led to a surprising  
18 recalibration of visual responses opposite in direction to visual perceptual shifts. This  
19 exposes differential aspects of multisensory plasticity across multisensory cortical areas,  
20 and reveals a novel hybrid of visual responses within a vestibular reference frame in  
21 parietal neurons.

22 **Highlights:**

- 23 • In the presence of a systematic heading conflict, visual and vestibular cues recalibrate  
24 towards one another to reduce the conflict.
- 25 • In MSTd, neuronal responses to vestibular and visual cues recalibrated, each  
26 according to their respective cues' perceptual shifts.
- 27 • In PIVC, vestibular responses recalibrated according to vestibular perceptual shifts  
28 (cells were not visually tuned).
- 29 • In VIP, neuronal responses to both vestibular and visual cues recalibrated together  
30 with vestibular perceptual shifts (opposite in direction to visual perceptual shifts).
- 31 • Profound differences in neuronal recalibration expose different functions across  
32 multisensory cortical areas.

33 **Abstract**

34 The adult brain demonstrates remarkable multisensory plasticity by dynamically  
35 recalibrating information from multiple sensory sources. When a systematic  
36 visual-vestibular heading offset is experienced, the unisensory perceptual estimates  
37 recalibrate toward each other (in opposite directions) to reduce the conflict. The neural  
38 substrate of this recalibration is unknown. Here, we recorded single-neuron activity  
39 from the dorsal medial superior temporal (MSTd), parieto-insular vestibular cortex  
40 (PIVC), and ventral intraparietal (VIP) areas in three male rhesus macaques during  
41 visual-vestibular recalibration. Both visual and vestibular tuning in MSTd recalibrated -  
42 each according to their respective cues' perceptual shifts. Vestibular tuning in PIVC  
43 also recalibrated together with corresponding perceptual shifts (cells were not visually  
44 tuned). By contrast, VIP neurons demonstrated a unique phenomenon: both  
45 vestibular and visual tuning recalibrated according to vestibular perceptual shifts.  
46 Such that, visual tuning shifted, surprisingly, contrary to visual perceptual shifts.  
47 Therefore, while unsupervised recalibration (to reduce cue conflict) occurs in early  
48 multisensory cortices, higher-level VIP reflects only a global shift, in vestibular space.

## 49 **Introduction**

50 Our different sensory systems each continuously adapt to changes in the  
51 environment (Webster, 2012). Thus, to maintain stable and coherent perception in a  
52 multisensory and ever-changing world, the brain needs to dynamically adjust for  
53 sensory discrepancies between the different modalities. This process of multisensory  
54 recalibration takes place continually, and is perhaps more fundamental than  
55 multisensory integration because integration would not be beneficial when the  
56 underlying cues are biased. While the neural bases of multisensory integration have  
57 received a lot of attention (Chen et al., 2013a; Ernst and Banks, 2002; Ernst and  
58 Bühlhoff, 2004; Ernst and Di Luca, 2011; Gu et al., 2008; Stein et al., 2014), the neural  
59 bases of multisensory recalibration have been explored to a much lesser degree.

60 Cross-modal recalibration has been observed in a variety of multisensory settings.  
61 One well-known example is the ventriloquist aftereffect (VAE), in which exposure to a  
62 consistent spatial discrepancy between auditory and visual stimuli induces a  
63 subsequent shift in the perceived location of sounds (Bertelson and De Gelder, 2004;  
64 Canon, 1970; Kramer et al., 2020; Radeau and Bertelson, 1974; Recanzone, 1998;  
65 Watson et al., 2021). Also, the rubber-hand illusion (RHI) leads to an offset in hand  
66 proprioception in the direction of the visually observed rubber hand (Abdulkarim et al.,  
67 2021; Botvinick and Cohen, 1998; Kennett et al., 2001; Thériault et al., 2022; Tsakiris  
68 and Haggard, 2005). Although it was initially thought that only the non-visual cues  
69 recalibrate to vision (visual dominance; (Brainard and Knudsen, 1993; Rock and  
70 Victor, 1964), further work in a variety of paradigms has revealed both visual and

71 non-visual recalibration (Atkins et al., 2003; Burge et al., 2010; Lewald, 2002; van  
72 Beers et al., 2002; Zaidel et al., 2011).

73 Most of what we know about multisensory recalibration is described at the  
74 behavioral level (Burge et al., 2008; Burge *et al.*, 2010; Lewald, 2002), with little  
75 known about its neuronal underpinnings. Recent EEG (Park and Kayser, 2021) and  
76 fMRI (Zierul et al., 2017) studies in humans have shed some light on this question.  
77 However, these methods lack the resolution to probe recalibration at the level of single  
78 neurons. A series of classic studies by Eric Knudsen and colleagues investigated  
79 multisensory plasticity at the neuronal and circuit levels, in the barn owl (Knudsen,  
80 2002; Knudsen and Brainard, 1991; Linkenhoker and Knudsen, 2002). They found  
81 profound neuronal plasticity in juvenile owls reared with prismatic lenses that  
82 systematically displaced their field of view. In that case, the auditory space map in the  
83 optic tectum was recalibrated to be aligned with the displaced visual field (Knudsen  
84 and Brainard, 1991). However, multisensory plasticity is not limited to the  
85 development, and the neuronal bases of how multiple sensory systems continuously  
86 adapt to one another in the adult brain remain fundamentally missing.

87 Self-motion perception (the subjective feeling of moving through space) relies  
88 primarily on visual and vestibular cues (Butler et al., 2015; Butler et al., 2010; de  
89 Winkel et al., 2010; Fetsch et al., 2012; Fetsch et al., 2009; Gu et al., 2007; Warren et  
90 al., 1988). Multisensory integration of visual and vestibular signals can improve  
91 heading perception (Burge *et al.*, 2010; Butler *et al.*, 2015; Dokka et al., 2015; Gu *et*  
92 *al.*, 2008). However, conflicting or inconsistent visual and vestibular information often

93 leads to motion sickness (Oman, 1990; Reason and Brand, 1975). Interestingly, this  
94 subsides after prolonged exposure to the sensory motion conflict, presumably through  
95 brain mechanisms of multisensory recalibration (Held, 1961; Shupak and Gordon,  
96 2006). Thus, self-motion perception – a vital skill for everyday function with intrinsic  
97 plasticity – offers a prime substrate to study cross-sensory recalibration.

98       We previously investigated and found robust (behavioral) recalibration of both  
99 visual and vestibular cues in response to a systematic vestibular-visual heading  
100 discrepancy (Zaidel *et al.*, 2011). In that paradigm, no external feedback was given.  
101 Thus, the need for recalibration arose solely because of the cue discrepancy (we  
102 therefore call this condition *unsupervised*). The subjects (humans and monkeys)  
103 recalibrated both visual and vestibular perceptual estimates by shifting them toward  
104 each other, to reduce the conflict. This is in line with the notion that unsupervised  
105 recalibration aims to maintain “internal consistency” between the cues (Burge *et al.*,  
106 2010). However, the neuronal basis of this everyday multisensory plasticity is  
107 unknown.

108       In a complementary behavioral study, we tested *supervised* self-motion  
109 recalibration, by providing external feedback regarding cue accuracy (Zaidel *et al.*,  
110 2013). There we found that supervised recalibration is a high-level cognitive process  
111 that compares the combined-cue (multisensory) estimate to feedback from the  
112 environment. This resulted in ‘yoked’ recalibration of both cues, in the same direction,  
113 to reduce conflict between the combined estimate and external feedback. We  
114 subsequently also investigated the neuronal substrate of *supervised* recalibration

115 (Zaidel et al., 2021). We found robust recalibration of both vestibular and visual  
116 neuronal tuning in the monkey ventral intraparietal (VIP) cortex, such that tuning for  
117 both cues shifted together, in accordance with the behavior. However, because in that  
118 paradigm both cues recalibrate in the same direction (yoking), neuronal tuning was  
119 also expected to shift in the same direction for both cues. Thus, differential aspects of  
120 neuronal recalibration for the individual cues could go undetected.

121 By contrast, in unsupervised recalibration, vestibular and visual cues shift in  
122 opposite directions (Zaidel *et al.*, 2011). Therefore, the unsupervised paradigm can  
123 better expose differences in the way that individual cues recalibrate to one-another in  
124 the brain. Because unsupervised recalibration occurs in the absence of external  
125 feedback, it is presumed to reflect implicit changes in perception. Thus, we expected  
126 to see its effects relatively early in the vestibular-visual integration hierarchy, and that  
127 these effects would propagate to higher-level areas. Unsupervised recalibration of  
128 single neurons in single behavioral sessions, has not been tested before. The  
129 resulting psychometric shifts are smaller (vs. supervised recalibration). Thus detecting  
130 its neuronal correlates is challenging, but imperative, to understand the neural bases  
131 of adult cross-sensory plasticity. Thus, the aim of this study was to test unsupervised  
132 recalibration of visual and vestibular neuronal tuning, and how it may differ across  
133 multisensory cortical areas.

134 Two relatively early multisensory cortical areas involved in self-motion perception  
135 are the medial superior temporal area (MSTd) and the parietal insular vestibular  
136 cortex (PIVC). Neurons in MSTd respond to large optic flow stimuli, conducive to the

137 visual perception of self-motion (Gu et al., 2006). Vestibular responses are also  
138 present in MSTd, however visual self-motion signals dominate (Gu *et al.*, 2008; Gu et  
139 al., 2012). PIVC has strong vestibular responses, without strong tuning to visual optic  
140 flow (Chen et al., 2010). Therefore, we expected to see perceptual shifts resulting  
141 from unsupervised calibration in MSTd and PIVC. Area VIP also has robust responses  
142 to visual and vestibular self-motion stimuli, however, it is marked by strong choice  
143 signals (Chen et al., 2016; Gu, 2018; Zaidel et al., 2017). It is thus considered a  
144 higher-level multisensory area involved in additional (currently not fully understood)  
145 cognitive functions. Different types of multisensory recalibration observed in these  
146 different multisensory areas can provide important insights into their differential  
147 underlying functions. Thus, in this study, we focused on these three multisensory  
148 cortical areas. We examined whether and how their visual and vestibular neural tuning  
149 changed in accordance with corresponding behavioral shifts during a single session  
150 (~1hr) of unsupervised cross-sensory recalibration.

## 151 **Results**

152 Three monkeys performed a task of heading discrimination in a paradigm that elicits  
153 unsupervised cross-sensory (vestibular-visual) recalibration. Simultaneous to  
154 behavioral performance, we recorded from single neurons extracellularly in areas  
155 MSTd (upper bank of the superior temporal sulcus, n=83: 19 from monkey D, 64 from  
156 monkey K), PIVC (upper bank and the tip of the lateral sulcus, n=160: 91 from  
157 monkey D, 69 from monkey B), and VIP (lower bank and tip of the intraparietal sulcus,



158 n=118: 103 from monkey D, 15 from monkey B). The paradigm followed the same  
159 methodology as our previous behavioral study (Zaidel *et al.*, 2011). It consisted of  
160 three consecutive blocks: pre-recalibration (**Fig. 1A**), recalibration (**Fig. 1B**), and  
161 post-recalibration (**Fig. 1C**). We first (in the next section) present the monkeys'  
162 perceptual recalibration results. Thereafter, we present the neural correlates thereof.

### A Pre-recalibration Block

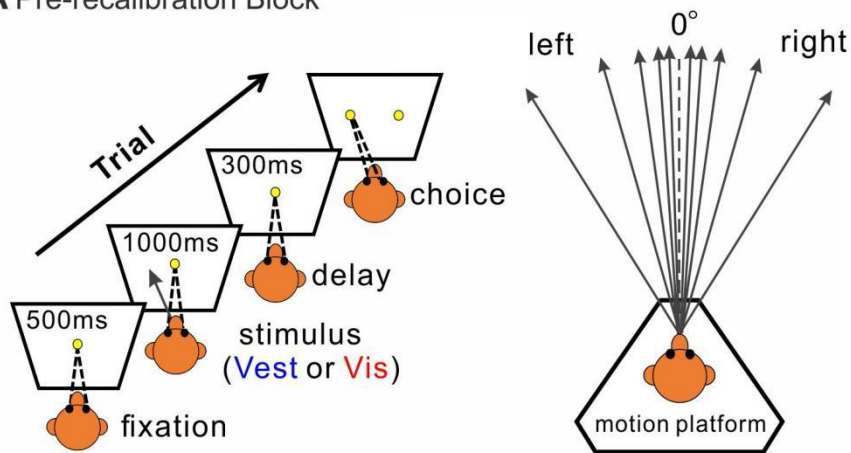

### B Recalibration Block

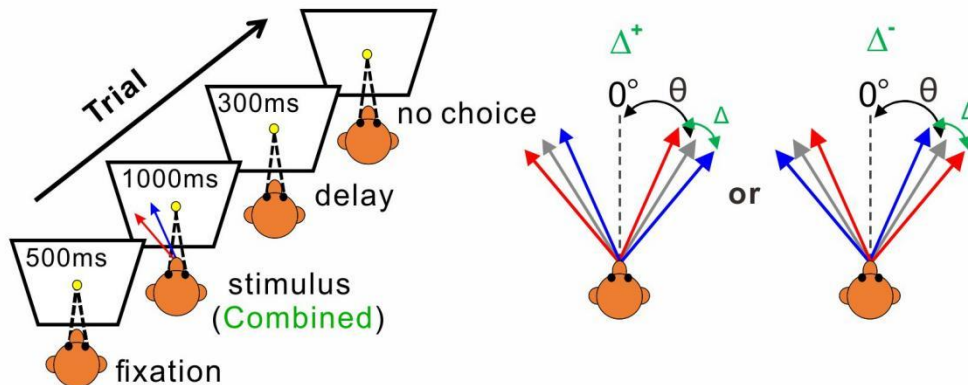

### C Post-recalibration Block

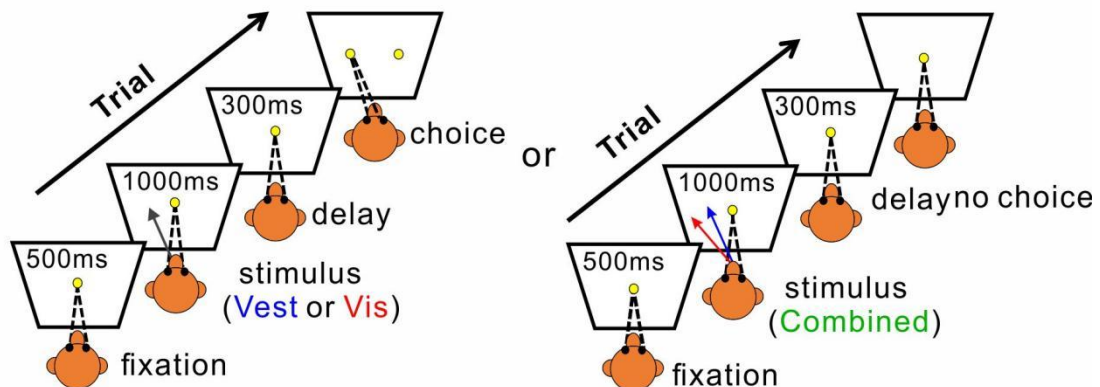

163 **Figure 1.** Multisensory recalibration paradigm. **(A)** Pre-recalibration block. The vestibular  
164 stimulus was provided by the motion platform (schematic on the right), and the visual stimulus  
165 was optic-flow simulation of self-motion (without motion of the platform) presented on a screen  
166 in front of the monkey (schematic on the left). The self-motion stimuli comprised linear motions  
167 (of either vestibular or visual stimuli) in a primarily forward direction, with slight deviations to  
168 the right or left (black arrows, schematic on the right). Monkeys were required to fixate on a  
169 central target (yellow circle) presented on the screen during the stimulus and then to report  
170 their perceived heading by making a saccade to one of two choice targets (left or right relative  
171 to straight ahead). **(B)** Recalibration block. Vestibular and visual stimuli were presented  
172 together (“combined”) with a systematic discrepancy ( $\Delta$ ) between the vestibular and visual  
173 headings. The blue and red arrows represent the vestibular and visual headings, respectively.  
174 The gray arrows represent the combined cue headings (in between the vestibular and visual  
175 cues) and the black dashed lines represent straight ahead. **(C)** Post-recalibration block. The  
176 single-cue trials (like in A) were interleaved with combined-cue trials (like in B).

177 ***Both vestibular and visual cues recalibrate toward each other***

178 **Figure 2** shows example psychophysical data from two experimental sessions.  
179 Replicating our previous behavioral results (Zaidel *et al.*, 2011), we found that both  
180 visual and vestibular psychometric functions shifted in the direction required to reduce  
181 the cue conflict. Namely, when the vestibular and visual heading stimuli were  
182 systematically offset, such that they consistently deviated to the right and the left,  
183 respectively ( $\Delta^+$ , **Fig. 2A**), the vestibular post-recalibration curve (blue) was shifted

184 rightward vs. pre-recalibration (black). Note that a rightward shift of the psychometric  
185 curve indicates a *leftward* perceptual shift (identified by a lower propensity for  
186 'rightward' choices at 0° heading for the blue curve). Complementarily, the visual  
187 post-recalibration psychometric curve (red) shifted leftward vs. pre-recalibration  
188 (black), albeit to a lesser degree, indicating a *rightward* perceptual shift. In a reverse  
189 manner, when the vestibular and visual heading stimuli were offset to the left and right  
190 respectively ( $\Delta^-$ , **Fig. 2B**), the vestibular post-recalibration curve (blue) shifted to the  
191 left, and the visual post-recalibration curve shifted to the right.

192 These behavioral shifts were quantified by the difference between the post- vs.  
193 pre-recalibration curves' PSEs (points of subjective equality). Each psychometric  
194 curve's PSE was detected by the heading at which it crosses  $y = 0.5$  (marked by  
195 horizontal dashed lines in **Fig. 2**). The vestibular and visual psychometric shifts were:  
196 3.40° and -1.01°, respectively in **Figure 2A**, and -3.68° and 1.00°, respectively, in  
197 **Figure 2B**. Thus, in both cases (**Fig. 2A, B**), both the vestibular and the visual cues  
198 shifted in the direction required to reduce the cue conflict (i.e. in opposite directions).  
199 Also, the vestibular shifts were larger (vs. visual).

200 These findings were consistent across sessions, as shown by the distributions of  
201 the vestibular and visual PSE shifts (solid bars for  $\Delta^+$  and striped bars for  $\Delta^-$ ) in **Figure**  
202 **2C**. The vestibular PSEs were shifted significantly to the right for the  $\Delta^+$  condition  
203 (mean  $\pm$  SE = 1.12°  $\pm$  0.12°;  $p = 2.54 \times 10^{-15}$ , paired t-test). And shifted significantly to  
204 the left for the  $\Delta^-$  condition (mean  $\pm$  SE = -1.76°  $\pm$  0.14°;  $p = 1.77 \times 10^{-29}$ , paired t-test).  
205 The visual PSEs were shifted significantly to the left for the  $\Delta^+$  condition (mean  $\pm$  SE =

206  $-0.73^\circ \pm 0.11^\circ$ ;  $p = 1.60 \times 10^{-10}$ , paired t-test). And shifted significantly to the right for  
207 the  $\Delta^-$  condition (mean  $\pm$  SE =  $1.10^\circ \pm 0.10^\circ$ ;  $p = 2.94 \times 10^{-21}$ , paired t-test). Thus,  
208 consistent with our previous study, both cues shifted (in opposite directions) to reduce  
209 the cue conflict.

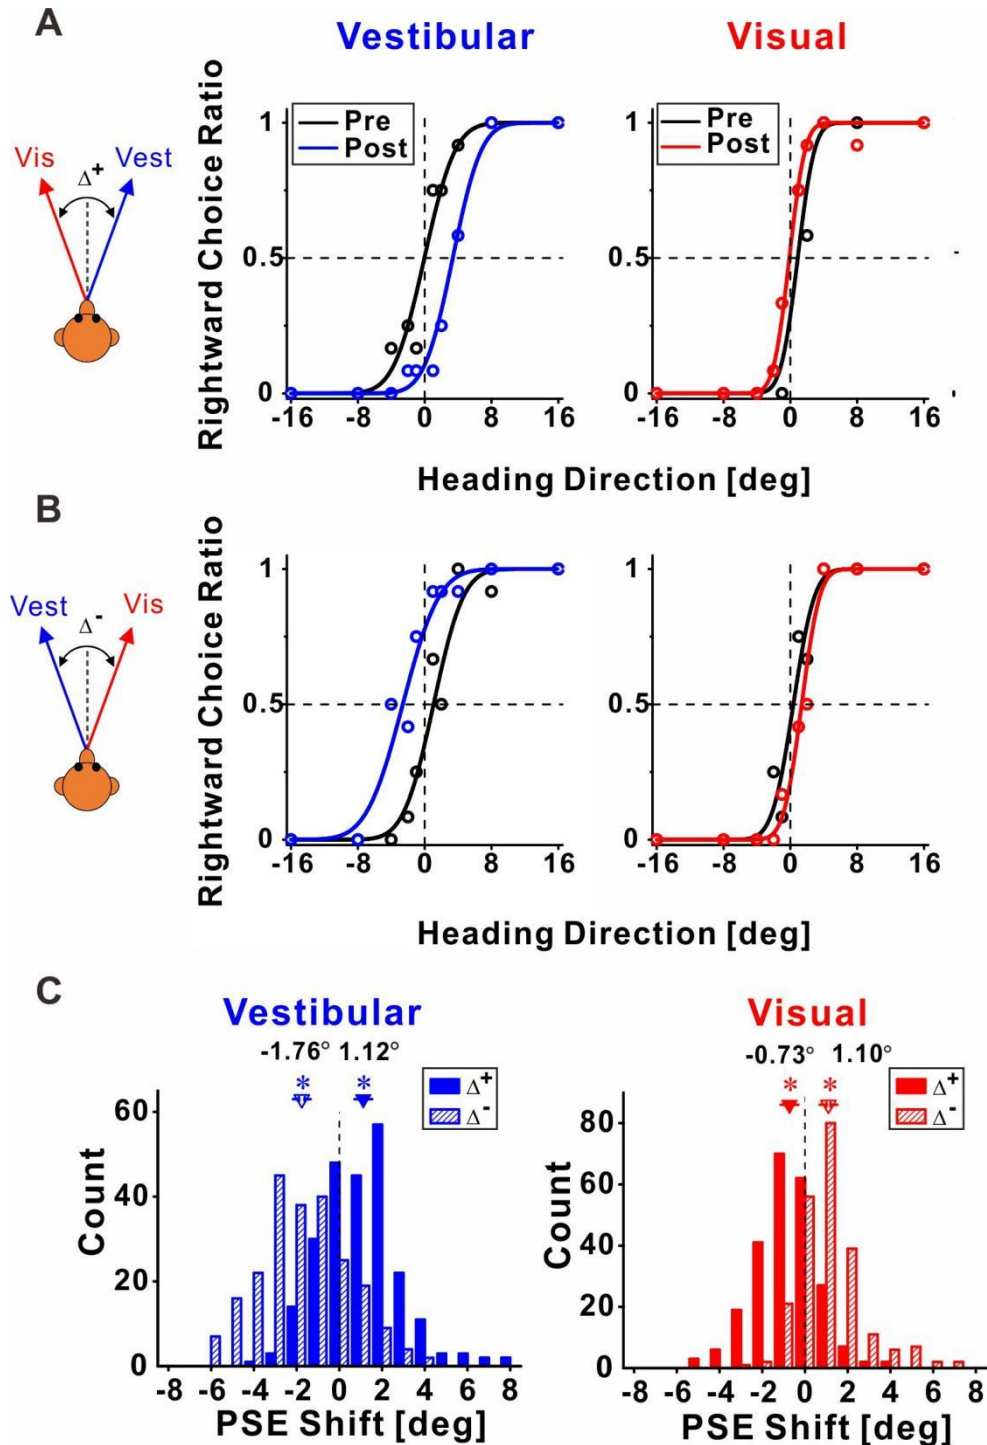

210 **Figure 2. Multisensory recalibration behavior. (A, B)** Example psychometric plots represent  
211 the ratio of the monkeys' rightward choices, as a function of stimulus heading direction. Data  
212 (circles) were fitted with cumulative Gaussian functions (solid lines). Pre-recalibration  
213 performance is presented for vestibular and visual cues (in the left and right columns,  
214 respectively) by the black curves. After recalibration, vestibular and visual cues were shifted  
215 (blue and red curves, respectively). Behavior for positive and negative delta ( $\Delta+$  and  $\Delta-$ ,  
216 respectively) are presented in A and B, respectively. (C) Blue and red histograms represent the  
217 vestibular and visual PSE shift distributions, respectively. Solid and slash-textured histograms  
218 indicate positive and negative  $\Delta$ , respectively. Inverted triangles ( $\blacktriangledown$ ) and error bars represent  
219 mean SEM shifts. The numbers above triangles are the mean PSE shift. Asterisk symbols  
220 indicate significant shifts ( $p < 0.05$ ). In vestibular cue,  $p = 2.54 \times 10^{-15}$  for  $\Delta+$  condition, and  $p =$   
221  $1.77 \times 10^{-29}$  for  $\Delta-$  condition, respectively. In visual cue,  $p = 1.60 \times 10^{-10}$ ,  $n = 241$  sessions for  
222  $\Delta+$  condition, and  $p = 2.94 \times 10^{-21}$ ,  $n = 227$  sessions for  $\Delta-$  condition, respectively, paired t-test.

223 Comparing the vestibular vs. visual shift magnitudes (using absolute values,  
224 pooled across  $\Delta^+$  and  $\Delta^-$  conditions) demonstrated significantly larger vestibular vs.  
225 visual shifts ( $1.43^\circ \pm 0.09$  and  $0.91^\circ \pm 0.07^\circ$ , respectively;  $p = 3.40 \times 10^{-5}$ , paired t-test).  
226 This result is also consistent with our previous study. Thus, the behavioral results from  
227 the original study (performed in the Angelaki laboratory) were replicated in these  
228 experiments (in the Chen laboratory) using a new set of monkeys, with simultaneous  
229 neuronal recording. In the following sections, we present how neuronal responses in  
230 areas MSTd, PIVC, and VIP (**Fig. 3, 4, and 5**, respectively) recalibrated in comparison

231 to the behavioral shifts.

232 ***Both vestibular and visual neuronal tuning in MSTd recalibrate with perceptual***  
233 ***shifts***

234 Responses of an example neuron recorded from MSTd during unsupervised  
235 recalibration are presented in **Figure 3A**. Behaviorally, the vestibular PSE shifted  
236 rightward and the visual PSE shifted leftward (upper panel, **Fig. 3A**). Shifts in  
237 neuronal tuning could be subtle, therefore we used neurometrics to expose and  
238 quantify the neuronal shifts. Specifically, we calculated neurometric responses for the  
239 heading stimuli using the neuron's firing rates and ROC analysis, and fit these with a  
240 cumulative Gaussian function (for method details, see Gu et al., 2007). PSEs were  
241 then extracted, similar to the psychometric curves. Neurometric curves for this  
242 example neuron are presented in the third row of **Figure 3A**. For this MSTd neuron,  
243 the vestibular neurometric shifted to the right, while the visual neurometric shifted to  
244 the left. Thus, the shifts in vestibular and visual tuning were consistent with the  
245 behavioral shifts.

246 Across the population (**Fig. 3B**) MSTd neuronal shifts were significantly  
247 correlated with the behavioral shifts, both for vestibular and visual cues ( $r = 0.44$ ,  $p =$   
248  $0.038$ ,  $N = 23$ , and  $r = 0.34$ ,  $p = 5.2 \times 10^{-3}$ ,  $N = 65$ , respectively; Pearson correlations).  
249 Therefore, in area MSTd neuronal recalibration occurs in accordance with perceptual  
250 recalibration, both for vestibular and visual cues.

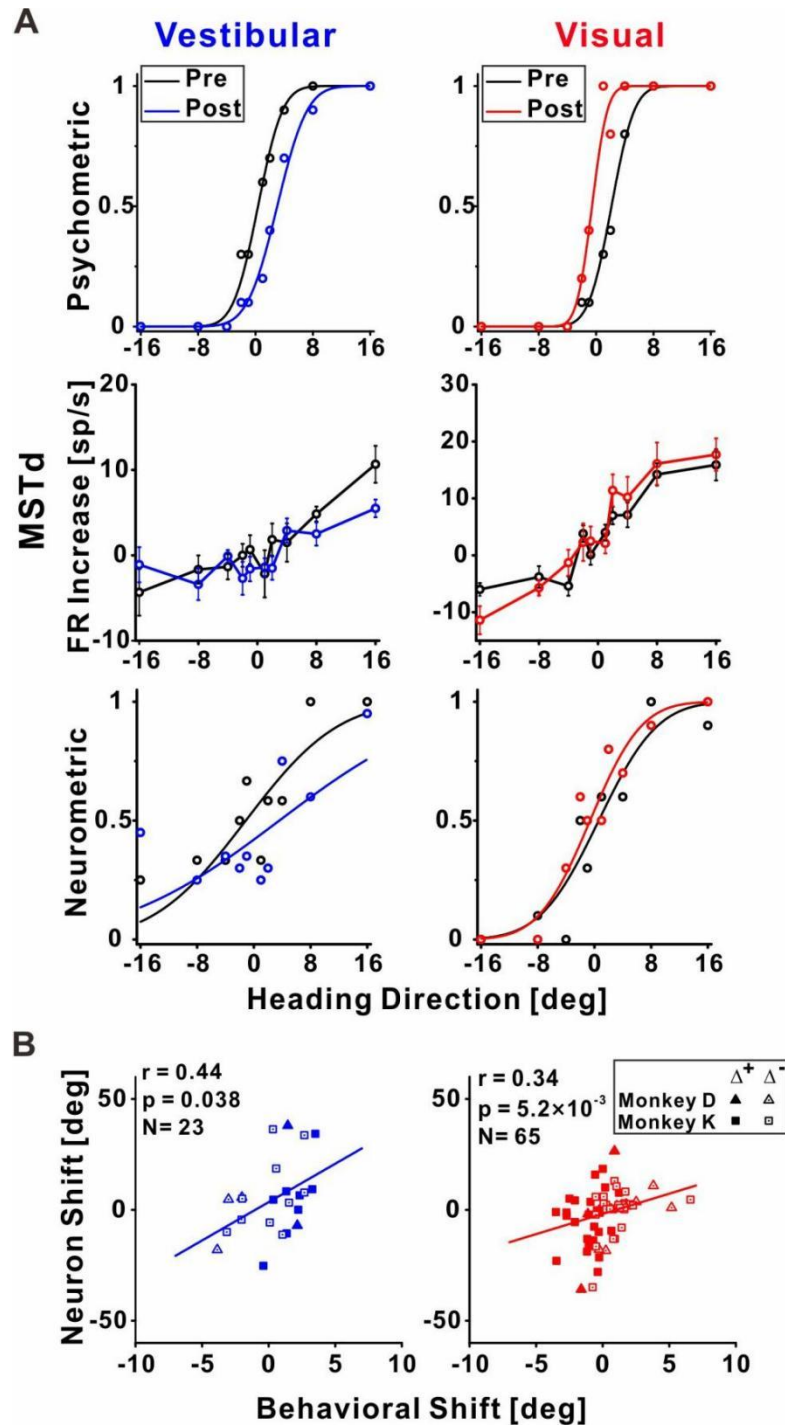

251 **Figure 3. MSTd neuronal recalibration.** (A) An example recalibration session ( $\Delta^+$ ) with  
 252 simultaneous recording from MSTd. The top row depicts the behavioral responses, pre-, and  
 253 post-recalibration. The vestibular psychometric curve shifted  $3.01^\circ$  (to the right) and the visual  
 254 curve shifted  $-2.71^\circ$  (to the left). Neuronal responses (second row) as a function of heading



255 (pre- and post-recalibration). Circles and error bars represent average firing rates (FRs,  
256 baseline subtracted)  $\pm$  SEM. The third row shows corresponding neurometric functions with  
257 best-fitting cumulative Gaussian functions. The vestibular neuronal shift was  $4.73^\circ$  (to the right)  
258 and the visual neuronal shift was  $-1.22^\circ$  (to the left). **(B)** Correlations between neuronal PSE  
259 shifts and behavioral PSE shifts for the vestibular and visual cues (left and right, respectively).  
260 Only cells with significant tuning ( $p < 0.05$ , Pearson correlation between firing rate and heading)  
261 in either pre- or post-recalibration blocks were included here. Solid symbols represent  $\Delta+$  and  
262 open symbols represent  $\Delta-$ . The solid lines illustrate the regression lines of the data.  $p = 0.038$ ,  
263  $n = 23$  neurons for vestibular cue,  $p = 5.2 \times 10^{-15}$ ,  $n = 65$  neurons for visual cue, Pearson  
264 correlation.

### 265 ***Vestibular neuronal tuning in PIVC recalibrates with perceptual shifts***

266 In PIVC, a similar result was observed for vestibular tuning. The example  
267 vestibular neurometric curve (**Fig. 4A**, bottom left) shifted to the right, which was  
268 consistent with the behavioral shift (**Fig. 4A**, top left). Across the population of PIVC  
269 neurons, a significant positive correlation was seen between the neuronal and  
270 behavioral shifts for the vestibular cue ( $r = 0.61$ ,  $p = 1.26 \times 10^{-5}$ ,  $N = 44$ , Pearson  
271 correlation; **Fig. 4B**, left panel).



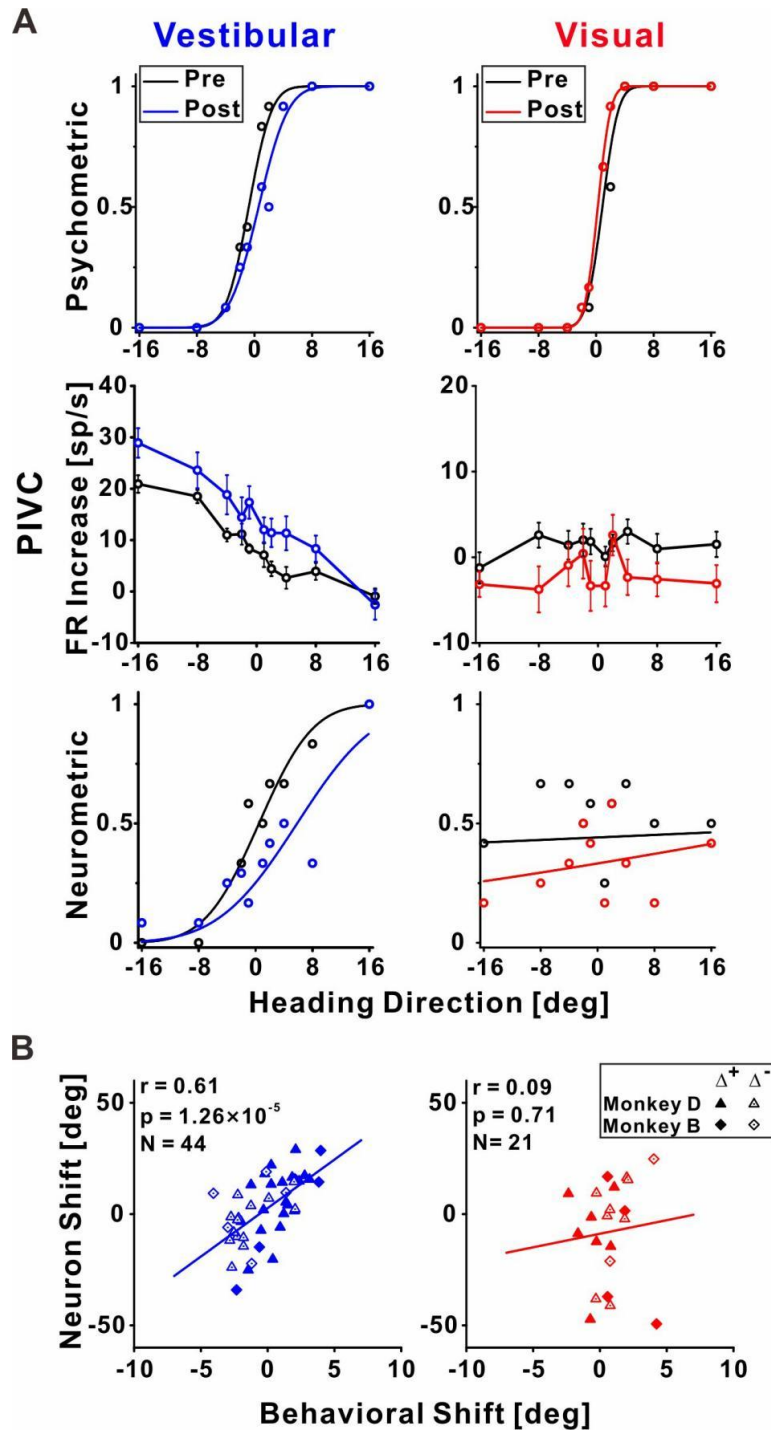

272 **Figure 4. PIVC neuronal recalibration. (A)** An example recalibration session ( $\Delta^+$ ) with  
273 simultaneous recording from PIVC (conventions are the same as **Figure 3**). The vestibular and  
274 visual psychometric curves shifted 1.37 and -0.51 (to the right and left, respectively). The  
275 vestibular neurometric curve shifted  $5.37^\circ$  (to the right). **(B)** Correlations between neuronal

276 PSE shifts and behavioral PSE shifts for the vestibular and visual cues.  $p = 1.26 \times 10^{-5}$ ,  $n = 44$   
277 neurons for vestibular cue,  $p = 0.71$ ,  $n = 21$  neurons for visual cue, Pearson correlation.

278 In terms of visual tuning, this example neuron (and the other PIVC neurons) did  
279 not demonstrate robust visual responses (**Fig. 4A**, middle right). However, we still  
280 applied the same neurometric analysis for visual responses, using PIVC neurons that  
281 passed the significance criterion for visual tuning (albeit weak). No significant  
282 correlation was seen between the neuronal and behavioral shifts for the visual cue  
283 ( $r=0.09$ ,  $p=0.71$ ,  $N=21$ , Pearson correlation). Thus, in PIVC, the primary cortical  
284 region involved in vestibular function, neuronal tuning shifts were consistent with  
285 perceptual shifts, for the vestibular cue.

286 ***Vestibular and visual neuronal tuning in VIP both follow vestibular perceptual***  
287 ***shifts***

288 **Figure 5A** presents an example neuron from VIP. For the vestibular cue, the  
289 neuronal tuning curve shifted rightward (**Fig. 5A**, bottom left), in accordance with the  
290 vestibular behavioral shift (**Fig. 5A**, top left). Surprisingly, the visual neurometric curve  
291 also shifted rightward (**Fig. 5A**, bottom right). This was unexpected because the visual  
292 psychometric curve shifted leftward (**Fig. 5A**, top right). Thus, while the vestibular and  
293 visual behavioral psychometric curves shifted in opposite directions (toward each  
294 other) the vestibular and visual neurometric curves shifted together, in accordance  
295 with the vestibular (not visual) behavioral shift.

296 Across the population of VIP neurons, the vestibular neurometric shifts were  
297 significantly positively correlated with the vestibular behavioral shifts ( $r = 0.69$ ,  $p =$   
298  $1.68 \times 10^{-8}$ ,  $N = 53$ , Pearson correlation; **Fig. 5B**, left). Like in MSTd and PIVC, the  
299 positive correlation coefficient indicates that neuronal and behavioral curves shifted in  
300 the same direction for the vestibular cue. By contrast, the visual neurometrics in VIP  
301 shifted in the opposite direction to the visual behavioral shifts. At the population level  
302 neuronal and behavioral shifts for the visual cue were negatively correlated ( $r = -0.45$ ,  
303  $p = 1.75 \times 10^{-4}$ , Pearson correlation,  $N = 66$ ; **Fig. 5B**, right). This exposes a striking  
304 mismatch between visual neuronal responses in VIP and visual perceptual function. It  
305 also exposes a striking mismatch between visual tuning in MSTd (which shifted in the  
306 same direction as visual perception) vs. VIP (which shifted contrary to visual  
307 perception).

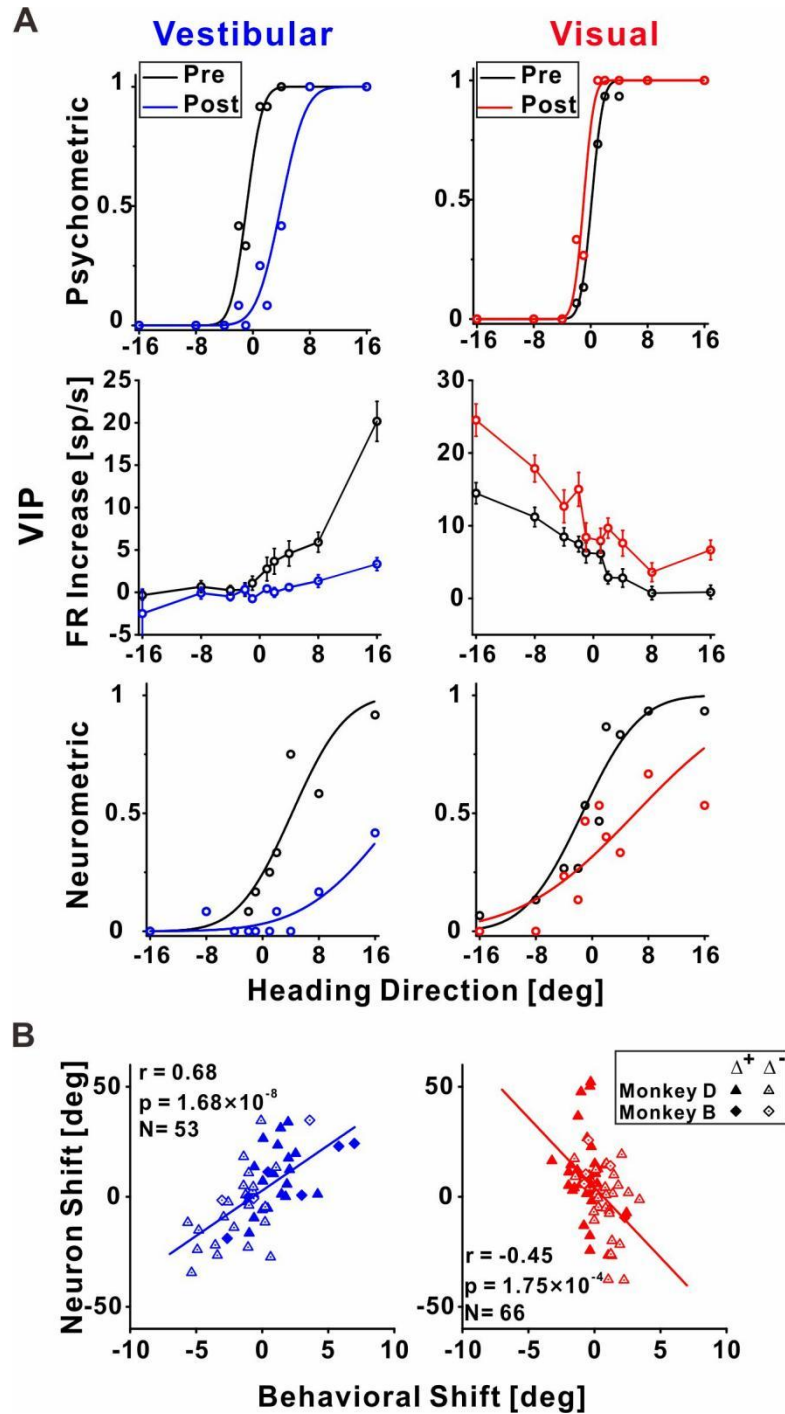

308 **Figure 5. VIP neuronal recalibration.** (A) An example recalibration session ( $\Delta^+$ ) with  
 309 simultaneous recording from VIP (conventions are the same as **Figure 3**). The vestibular and  
 310 visual psychometric curves shifted  $4.81^\circ$  and  $-1.13^\circ$  (to the right and left, respectively). The  
 311 vestibular and visual neurometric curves shifted  $15.18^\circ$  and  $7.58^\circ$ , respectively (both to the

312 right). **(B)** Correlations between neuronal PSE shifts and behavioral PSE shifts for the  
313 vestibular and visual cues.  $p = 1.68 \times 10^{-8}$ ,  $n = 53$  neurons for vestibular cue,  $p = -0.45 \times 10^{-4}$ ,  
314  $n = 66$  neurons for visual cue, Pearson correlation.

315 To test whether this mismatch between behavior and tuning for visual cues in VIP  
316 relates to specific subtypes of neurons, we sorted the VIP data into three subsets:  
317 neurons with multisensory (vestibular and visual) responses, and two groups with  
318 unisensory (only vestibular or only visual) responses (**Supplemental Fig. 1A**). Similar  
319 results were seen for both multisensory and unisensory neurons (the  
320 neuronal-behavioral correlations remained consistently positive and negative for  
321 vestibular and visual cues, respectively). We further sorted the multisensory neurons  
322 into those with congruent and opposite vestibular and visual heading preferences  
323 (Chen et al., 2011b; Gu *et al.*, 2006) with no observable differences (**Supplemental**  
324 **Fig. 1B**). Therefore, the contrary shifts of visual tuning in VIP seem to reflect a general  
325 feature of this cortical area, rather than an anomaly of a subgroup of neurons.

### 326 ***Temporal evolution of the correlation between neuronal and behavioral shifts***

327 The tuning curves in **Figures 3–5** were calculated using mean firing rates  
328 averaged across the stimulus duration. But the self-motion stimuli generated by the  
329 platform and optic flow followed a specific dynamical time-course, specifically, a  
330 Gaussian velocity profile and correspondingly a biphasic acceleration profile (see  
331 bottom row, **Fig. 6**). Therefore, we further examined whether the correlations between

332 behavioral recalibration and shifts in neuronal tuning depend on the time point within  
333 the stimulus interval.

334 For MSTd neurons, positive correlations (between behavioral and neuronal shifts)  
335 were seen for both vestibular and visual cues during the stimulus (**Fig. 6A**). The  
336 profile of correlations followed the velocity profile closely. Namely correlations  
337 increased toward the middle of the stimulus, and dropped off rapidly at the end of the  
338 stimulus. Significant correlations (blue and red asterisk markers for vestibular and  
339 visual cues, respectively) were only seen around the middle of the stimulus. Thus  
340 neural recalibration in MSTd (in accordance with behavioral recalibration) is seen in  
341 velocity responses, which are transient (evident only during the stimulus).

342 For PIVC neurons, positive correlations (between behavioral and neuronal shifts)  
343 were seen only for vestibular cues, during the stimulus (**Fig. 6B**). Like MSTd, the  
344 correlations seemed to follow the velocity profile of the stimulus, with significant  
345 values around the middle of the stimulus (upper panel in **Fig. 6B**). Correlations in the  
346 visual condition were very weak and not significant (middle panel in **Fig. 6B**).

347 A very different profile was seen in VIP. Firstly, as described above, correlations  
348 between neuronal and behavioral recalibration were positive for the vestibular cue  
349 (upper panel in **Fig. 6C**) and negative for the visual cue (middle panel in **Fig. 6C**).  
350 Furthermore, the time-course of these correlations was different in VIP: they  
351 increased in size gradually (positively for vestibular and negatively for visual),  
352 reaching a maximum around the middle of the stimulus epoch (the velocity peak), but  
353 then remained elevated beyond the end of the stimulus (**Fig. 6C**). This pattern is in

354 line with sustained neuronal activity described previously for VIP. However, here this  
 355 sustained activity correlated with subsequent vestibular choices, and was contrary to  
 356 visual choices. Thus the sustained activity is not generically choice related, but rather  
 357 in accordance with recalibrated vestibular function.

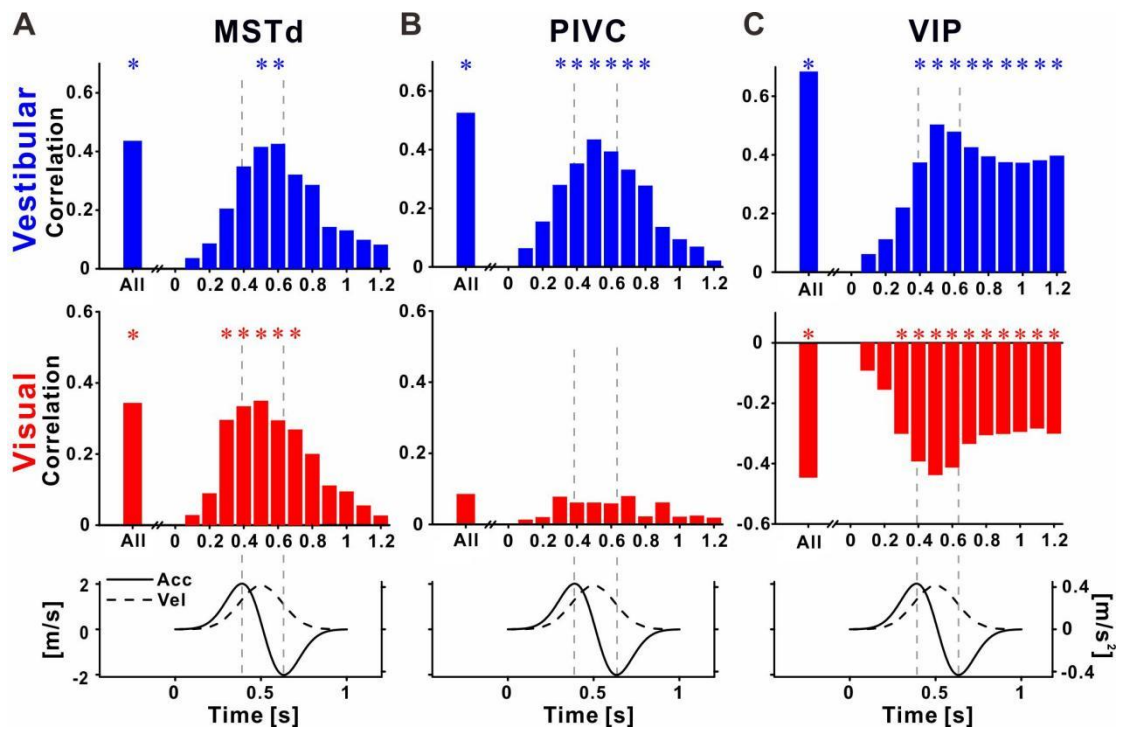

358 **Figure 6. Recalibration of neuronal responses within the stimulus time-course.**  
 359 Correlations between neuronal and behavioral PSE shifts, using the neuronal activity at  
 360 specific time-points during the stimulus, for **(A)** MSTd, **(B)** PIVC, and **(C)** VIP. Top row:  
 361 vestibular (blue histograms), second row: visual (red histograms), third row: stimulus  
 362 (acceleration and velocity) time-course. Vertical dashed lines mark the acceleration peaks, and  
 363 \* symbols mark significant correlations. Pearson correlation.

364 ***VIP choice signals are reduced during cross-sensory recalibration***

365 Previous studies have found that neuronal responses in VIP are strongly  
366 influenced (perhaps even dominated) by choice signals (Chen et al., 2021; Zaidel *et*  
367 *al.*, 2017). Hence our finding here, that neuronal tuning recalibrated contrary to  
368 behavioral shifts for the visual cue, was surprising and counterintuitive. We therefore  
369 wondered what happened to the strong choice signals for which VIP is renowned,  
370 which would predict that neuronal tuning (also for visual cues) would shift with  
371 behavior. To visualize choice tuning for an example VIP neuron, we plotted  
372 'choice-conditioned' tuning curves, namely, neuronal responses as a function of  
373 heading, separately for rightward and leftward choices, (**Fig. 7**). In the  
374 pre-recalibration block vestibular responses were strongly choice related (**Fig. 7A**, left  
375 plot) – neuronal responses to the same heading stimulus were larger when followed  
376 by rightward (▶, dark blue) vs. leftward (◀, cyan) choices (the dark blue line lies  
377 above the cyan line). After recalibration, the choice effect decreased (**Fig. 7A**, right  
378 plot) – the choice-conditioned tuning curves were no longer separate. Similarly, visual  
379 responses were strongly choice-related pre-recalibration, and this decreased  
380 post-recalibration (**Fig. 7B**). To quantify the choice (and sensory) components of  
381 neuronal activity, and to observe how these changed after recalibration, we applied a  
382 partial correlation analysis (Zaidel *et al.*, 2017). For this example neuron, the partial  
383 choice correlation values ( $R_c$ , presented on the plots) were reduced both for vestibular  
384 and visual cues.



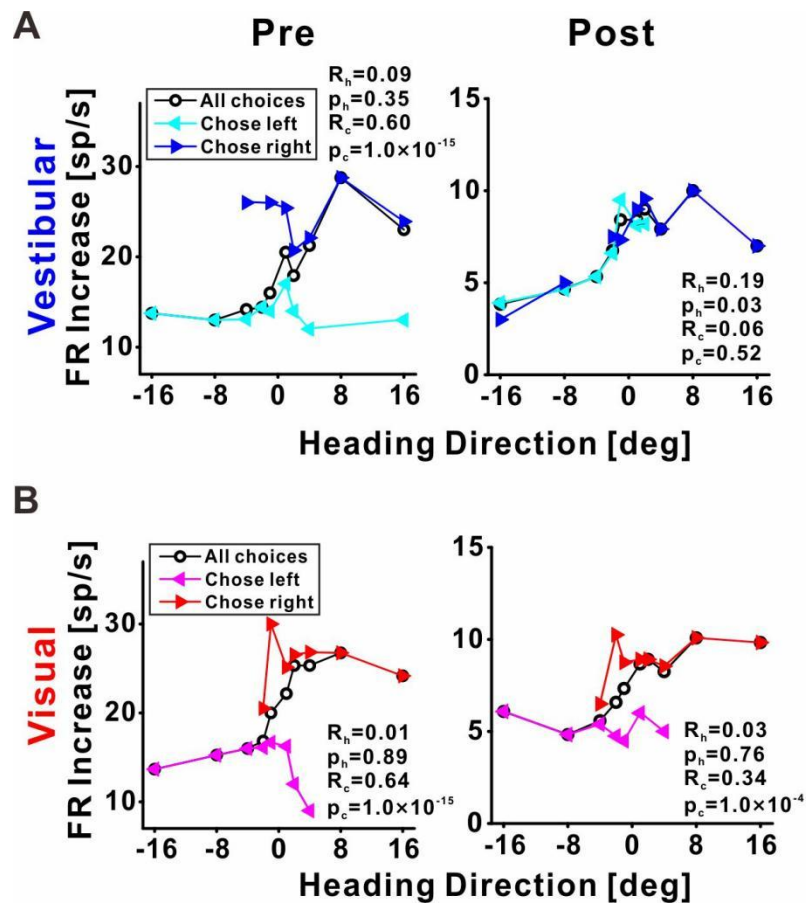

385 **Figure 7. Choice tuning is reduced post-recalibration in an example VIP neuron.**

386 Neuronal responses for example VIP neuron to **(A)** vestibular and **(B)** visual heading stimuli,

387 pre- and post-recalibration (left and right columns, respectively). Blue and cyan curves depict

388 choice-conditioned tuning curves (neuronal responses followed by rightward and leftward

389 choices, respectively) for the vestibular cue. Red and magenta curves depict

390 choice-conditioned tuning curves for the visual cue. Black curves (in the corresponding plots)

391 represent all responses (not sorted by choice). Partial heading ( $R_h$ ) and partial choice ( $R_c$ )

392 correlations (with corresponding p-values) are presented on the plots.

393 Across our sample of VIP neurons, the choice partial correlations in the

394 post-recalibration block were significantly reduced compared to the pre-recalibration

395 block, for both vestibular ( $p = 3.73 \times 10^{-3}$ , paired  $t$ -test) and visual ( $p = 4.39 \times 10^{-3}$ ,  
396 paired  $t$ -test; **Fig. 8B**) cues. However, the heading partial correlations ( $R_h$ ) did not  
397 differ significantly from pre- to post-recalibration, neither for vestibular ( $p = 0.36$ ,  
398 paired  $t$ -test) nor visual ( $p = 0.47$ , paired  $t$ -test; **Fig. 8A**) cues. For these statistical  
399 comparisons and for plotting we used the squared partial correlations (which quantify  
400 the amount of unique variance explained by choice or heading). We did not observe  
401 any changes in partial correlations in areas PIVC and MSTd (**Supplemental Fig. 2**).  
402 Lastly, there was no evidence for differences between post- and pre-recalibration  
403 baseline firing rates in any of the three areas (**Supplemental Fig. 3**; Bayes Factors  
404 ( $BF_{10}$ ) presented on the corresponding subplots). Thus, shifts in neuronal tuning are  
405 not explained by changes in baseline activity.

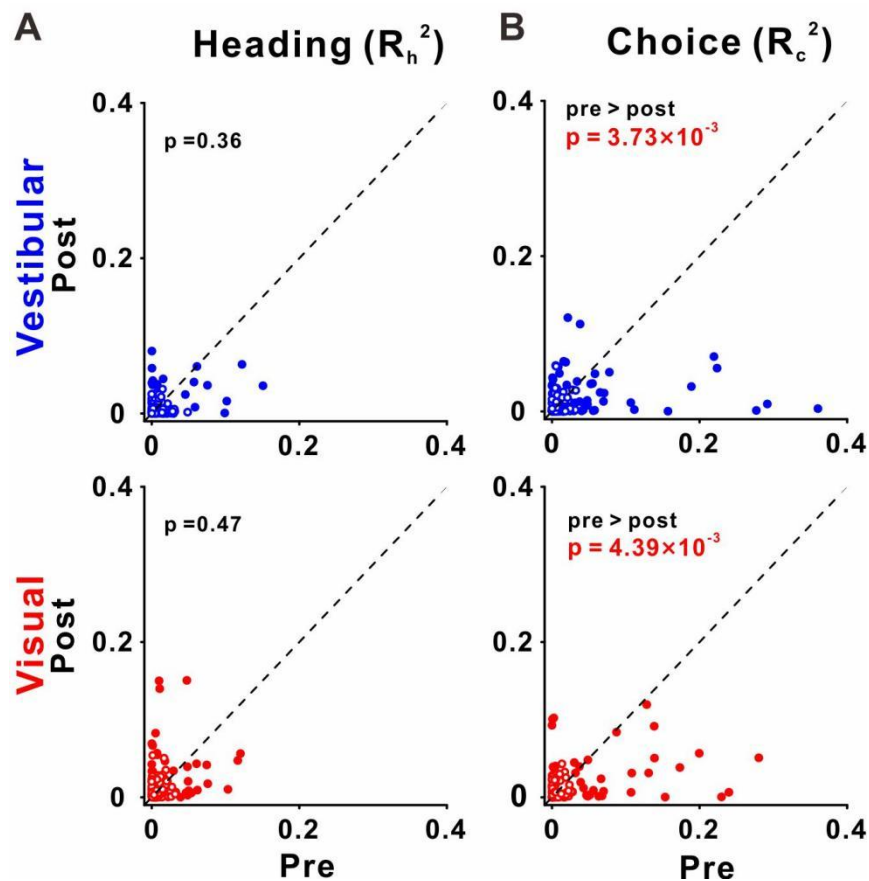

406 **Figure 8. Choice tuning is reduced in VIP post-recalibration. (A)** Heading and **(B)** choice  
407 partial correlation coefficients (squared) are depicted post- vs. pre-recalibration. Blue and red  
408 dots (top and bottom row) represent vestibular and visual cues, respectively. P-values for the  
409 hypothesis of greater pre- vs. post-recalibration values are presented on the corresponding  
410 plots. Paired t-test.

## 411 **Discussion**

412 This study provides the first demonstration of unsupervised (cross-sensory)  
413 neuronal recalibration, in conjunction with behavioral recalibration, in single sessions.  
414 Single-neurons from MSTd, PIVC, and VIP revealed clear but different patterns of  
415 recalibration. In MSTd, neuronal responses to vestibular and visual cues recalibrated -  
416 each according to their respective cues' perceptual shifts. In PIVC, vestibular tuning  
417 similarly recalibrated together with the corresponding vestibular perceptual shifts (the  
418 PIVC cells were not robustly tuned to visual stimuli). However, recalibration in VIP was  
419 notably different: both vestibular and visual neuronal tuning recalibrated in the  
420 direction of the vestibular perceptual shifts. Thus, visual neuronal tuning shifted,  
421 surprisingly, contrary to visual perceptual shifts. These results indicate that neuronal  
422 recalibration differs profoundly across multisensory cortical areas.

## 423 **Neural correlates of vestibular-visual recalibration**

424 To investigate the neuronal bases of unsupervised cross-sensory recalibration,  
425 we first replicated the behavioral results from our previous study (Zaidel *et al.*, 2011).

426 Indeed, in the presence of a systematic vestibular-visual heading offset (with no  
427 external feedback) vestibular and visual cues both recalibrated in the direction  
428 required to reduce the cue conflict. And, as before, the vestibular shifts were larger  
429 compared to the visual shifts. Thus we confirmed robust recalibration of vestibular and  
430 visual cues, resulting from a systematic discrepancy between the cues' headings in an  
431 unsupervised context (i.e., without external feedback).

432 Since there was no external feedback regarding which cue was (in)accurate,  
433 unsupervised recalibration is driven by the cue conflict, presumably through an  
434 internal mechanism to maintain consistency between vestibular and visual perceptual  
435 estimates (Zaidel *et al.*, 2011). Accordingly, we expected to see neuronal correlates of  
436 perceptual recalibration in early multisensory areas related to self-motion perception,  
437 specifically: MSTd, which primarily responds to visual (but also vestibular) self-motion  
438 stimuli, and PIVC, which primarily responds to vestibular stimuli. We further expected  
439 that the neuronal recalibration in MSTd and PIVC would propagate to higher-level  
440 multisensory area VIP.

441 In MSTd, we indeed found that both visual and vestibular neuronal signals  
442 recalibrated, each in accordance with their corresponding cue's behavioral shifts.  
443 Hence, recalibration of visual self-motion responses was observed at least at the level  
444 of MSTd, which is the primary area in the visual hierarchy to respond to large field  
445 optic flow stimuli (Britten, 2008; Britten and van Wezel, 1998; 2002; Duffy and Wurtz,  
446 1995; Gu *et al.*, 2008; Gu *et al.*, 2012; Gu *et al.*, 2006; Wurtz and Duffy, 1992). We  
447 cannot ascertain whether recalibration to visual responses occurred already in earlier

448 visual regions, such as the middle temporal visual area (MT), which projects to MSTd  
449 (Maunsell and van Essen, 1983; Ungerleider and Desimone, 1986), or whether it  
450 occurred only at the level of MSTd. Because MSTd is mainly a visual area, the  
451 recalibration of vestibular signals observed in MSTd likely occurred in upstream  
452 vestibular areas that project to MSTd, such as PIVC (Chen *et al.*, 2010; 2011a).  
453 Indeed, robust vestibular recalibration (that was in line with the vestibular behavioral  
454 shifts) was observed in PIVC. Hence, neuronal correlates of perceptual recalibration  
455 were observed in relatively early multisensory areas related to self-motion perception  
456 (MSTd and PIVC).

#### 457 **Individualized recalibration of vestibular and visual cues**

458 Results from this experiment exposed individualized (sensory-specific) neuronal  
459 recalibration (in MSTd and PIVC). Namely, visual and vestibular tuning curves shifted  
460 differently (in opposite directions). This provides neuronal evidence against ‘visual  
461 dominance’, even for short-term recalibration (in single sessions). Rather, it supports  
462 the idea that cross-sensory neuronal recalibration occurs also for visual (and not only  
463 for non-visual) cues.

464 Furthermore, sensory-specific recalibration of visual and vestibular tuning implies  
465 that the brain has mechanisms to separately monitor and recalibrate individual cues.  
466 Cue-specific shifts in neuronal tuning were not seen during supervised recalibration,  
467 because the cues largely shift together, in response to external feedback (Zaidel *et al.*,  
468 2021). Even though in the supervised condition both unsupervised and supervised

469 shifts are in operation (superimposed, Zaidel et al. 2013), the supervised (yoked)  
470 component is large and dominates, thereby obscuring the individualized  
471 (unsupervised) shifts. Here, without external feedback, we were able to detect  
472 individualized shifts of the different cues, not previously observed. This exposes  
473 neuronal mechanisms to maintain internal consistency between vestibular and visual  
474 cues. This dynamic cross-sensory plasticity may underlie our adept ability to adapt to  
475 sensory conflict commonly experienced in many modes of transport (on land, at sea,  
476 or in flight).

#### 477 **Contrary recalibration in higher-level area VIP**

478 VIP is a higher-level multisensory area (Bremmer et al., 2002; Colby et al., 1993;  
479 Duhamel et al., 1998; Schlack et al., 2002; Schlack et al., 2005; Schroeder and Foxe,  
480 2002) with clear vestibular and visual heading selectivity (Chen *et al.*, 2011a; b). But  
481 the nature of these self-motion signals in VIP is not fully understood. In contrast to our  
482 prediction that recalibrated signals in MSTd and PIVC would simply propagate to VIP,  
483 we found a different and unexpected pattern of recalibration in VIP. While vestibular  
484 tuning recalibrated in line with vestibular perceptual shifts (like MSTd and PIVC),  
485 visual tuning recalibrated opposite in direction to the visual perceptual shifts (and  
486 opposite in direction to MSTd visual recalibration). These findings indicate that visual  
487 responses in VIP do not reflect a simple feed-forward projection from MSTd. They  
488 also suggest that visual responses in VIP are not decoded for heading perception  
489 (otherwise these would not recalibrate in opposite directions). This interpretation is in

490 line with findings that inactivation (Chen *et al.*, 2016) and microstimulation (Yu and Gu,  
491 2018) in VIP do not affect perceptual decisions. Thus, the convergence of visual and  
492 vestibular signals in VIP likely serves purposes other than cue integration.

493 The results here also shed new light on the neuronal shifts observed in VIP  
494 during supervised recalibration (Zaidel *et al.*, 2017). There, because behavioral  
495 responses shifted in the same direction for both cues, it was reasonable to interpret  
496 visual and vestibular tuning shifts in accordance with their corresponding cue shifts.  
497 However, the results here indicate that yoking of visual and vestibular tuning is  
498 observed in VIP irrespective of the paradigm (supervised or unsupervised). Hence  
499 yoked recalibration is a feature of VIP, not just supervised recalibration.

500 We previously found strong choice-related activity in VIP neurons (Zaidel *et al.*,  
501 2017). Accordingly, we considered that shifts in VIP neuronal tuning (during  
502 supervised calibration) might simply reflect the altered choices (Zaidel *et al.*, 2021).  
503 However, choice-related activity cannot explain the results here, because the  
504 predicted shifts in neuronal tuning would be in the same direction as the altered  
505 choices (behavioral shifts), whereas we found contrary visual recalibration. To  
506 understand contrary shifts that could arise despite strong choice-related activity in VIP,  
507 we investigated choice tuning in VIP neurons. We found that choice tuning in VIP  
508 decreased during unsupervised calibration. This allowed contrary shifts to be exposed.  
509 It also opens up new and fascinating questions regarding the purpose of contrary  
510 visual recalibration in VIP.

511 Because visual and vestibular tuning in VIP both shifted in the same direction (in

512 accordance with vestibular behavioral shifts) we speculate that VIP recalibration  
513 reflects a global shift in the reference frame, following vestibular recalibration. This  
514 notion is consistent with suggestions that VIP encodes self-motion in head or  
515 body-centered coordinates (Chen et al., 2013b; 2018; Zhang et al., 2004). Accordingly,  
516 visual responses in VIP are transformed into a vestibular-recalibrated space. This  
517 leads to a remarkable dissociation between visual tuning in VIP and MSTd.  
518 Interestingly, visual self-motion perception follows the MSTd (not VIP) recalibration.  
519 This is in line with a causal connection between MSTd and visual heading  
520 discrimination (Britten and van Wezel, 1998; Gu *et al.*, 2012). What purpose might  
521 such visual signals in VIP serve? One possible idea is that they might reflect an  
522 expectation signal – e.g., predicted vestibular or somatosensory sensation, based on  
523 the current visual signal. During combined stimuli (in the recalibration and  
524 post-calibration blocks), the visual signal always appeared together with the vestibular  
525 sensory input. Thus, if visual responses in VIP reflect vestibular expectations, then  
526 these would shift together with vestibular (rather than visual) recalibration.

## 527 **Limitations and future directions**

528 Our results revealed correlations between neuronal recalibration and  
529 cross-sensory behavioral recalibration. However, they do not implicate any causal  
530 connections. Therefore, whether these cortical areas are actively involved in  
531 cross-sensory recalibration, vs. simply reflecting the recalibrated signals, requires  
532 further research. To probe more directly for causal links, direct manipulation of



533 neuronal activity might be required. For example, would reversible inactivation or  
534 microstimulation (of one or a combination of these multisensory areas) eliminate (or  
535 bias) unsupervised recalibration? In addition, future studies are needed to examine  
536 how the systematic error between vestibular and visual heading signals is detected.  
537 This likely involves additional brain areas, for example, the cerebellum, implicated in  
538 internal-model-based error monitoring (Markov et al., 2021; Rondi-Reig et al., 2014),  
539 and/or the Anterior Cingulate Cortex (ACC), implicated in conflict monitoring (Bush et  
540 al., 2000; Holroyd and Coles, 2002). Thus, a wide-ranging effort to record and  
541 manipulate neural activity across a variety of brain regions will be necessary to tease  
542 apart the circuitry underlying this complex and important function.

543 The most surprising and intriguing finding in this study was the contrary  
544 recalibration of visual tuning in VIP. We propose that yoked recalibration of visual and  
545 vestibular responses in VIP (despite differential behavioral recalibration) might reflect  
546 a global shift in vestibular space. Accordingly, we suggest that visual responses in VIP  
547 might reflect an expectation signal (in vestibular space), e.g., a simulation of the  
548 expected corresponding vestibular response (or integrated position, because VIP  
549 responses are sustained beyond the stimulus period). However, this idea is  
550 speculative, and the data from this study cannot address this question. Hence, further  
551 research is needed to investigate this idea, for example, by conditioning expectations  
552 for vestibular motion on other (non-motion) cues, and investigating whether these  
553 cues can induce simulated vestibular responses. If this hypothesis turns out to be true,  
554 it could greatly contribute to our understanding regarding the functions of the parietal

555 cortex, and the brain mechanisms of perceptual inference.

## 556 **Concluding remarks**

557 This study exposed individualized (sensory-specific) recalibration of neuronal  
558 signals, resulting from a cross-sensory (visual-vestibular) cue conflict. It further  
559 revealed profound differences in neuronal recalibration across multisensory cortical  
560 areas MSTd, PIVC and VIP. The results therefore provide novel insights into adult  
561 multisensory plasticity, and deepen our understanding regarding the different  
562 functions of these multisensory cortical areas.

## 563 **Methods**

### 564 ***Subjects and surgery.***

565 Three male rhesus monkeys (*Macaca mulatta*, monkeys D, B, and K) weighing  
566 8–10 kg participated in the experiment. Monkeys were first trained to sit in a custom  
567 primate chair and gradually exposed to the laboratory environment. Then they  
568 chronically implanted a head-restraint cap and a sclera coil for measuring eye  
569 movement. After full recovery, monkeys were trained to perform experimental tasks.  
570 All animal surgeries and experimental procedures were approved by the Institutional  
571 Animal Care and Use Committee at East China Normal University (IACUC protocol  
572 number: Mo20200101).

573 ***Equipment setup and motion stimuli***

574 During the experiments, monkeys were head-fixed and seated in a primate chair  
575 which was secured to a six-degree of freedom motion platform (Moog, East Aurora,  
576 NY, USA; MB-E-6DOF/12/1000Kg). The chair was also inside the magnetic field coil  
577 frame (Crist Instrument Co., Inc., Hagerstown, MD, USA) mounted on the platform for  
578 measuring eye movement with the sclera coil technique (for details, see Zhao et al.,  
579 2021).

580 Vestibular stimuli were delivered by the motion platform (for details, see Gu et al.,  
581 2006; Chen et al., 2013; Zhao et al., 2021). Visual stimuli were presented on a large  
582 computer screen (Philips BDL4225E, Royal Philips, Amsterdam, Netherlands),  
583 attached to the field coil frame. The display (62.5 cm × 51.5 cm) was viewed from a  
584 distance of 43 cm, thus subtending a visual angle of 72° × 62°. The sides of the coil  
585 frame were covered with a black enclosure, so the monkey could only see the visual  
586 stimuli on the screen (Gu *et al.*, 2006; Zhao et al., 2021). The display had a pixel  
587 resolution of 1920 x 1080 and was updated at 60 Hz. Visual stimuli were programmed  
588 in OpenGL to simulate self-motion through a 3D cloud of “stars” that occupied a virtual  
589 cube space 80 cm wide, 80 cm tall, and 80 cm deep centered on the central point on  
590 the screen. The random-dot density was 0.01/cm<sup>3</sup> (each “star” comprised a triangle  
591 with base by height: 0.15 cm × 0.15 cm). Monkeys wore custom stereo glasses made  
592 from Wratten filters (red #29 and green #61; Barrington, NJ, USA), such that the optic  
593 flow stimuli could be rendered in three dimensions as red-green anaglyphs.

594 The self-motion stimulus was either vestibular-only, visual-only, or combined  
595 (visual and vestibular stimuli). In the vestibular-only condition, there was no optical  
596 flow on the screen and the monkey was translated by the motion platform. In the  
597 visual-only condition, the motion platform remained stationary while the optic flow was  
598 presented on the screen. For the combined condition, the monkey experienced both  
599 translation motion and optic flow simultaneously. Each stimulus motion followed a  
600 Gaussian profile with a duration of 1 s, and an amplitude of 13 cm (bottom row, **Fig. 6**).  
601 The peak velocity was 0.41 m/s, and the peak acceleration was 2.0 m/s<sup>2</sup>.

#### 602 ***Task and recalibration protocol***

603 The monkeys were trained to report their direction of translation with a  
604 two-alternative forced-choice (2AFC) heading discrimination task (for details, see Gu  
605 et al., 2008; Chen et al., 2013). In each trial, the monkey experienced a primarily  
606 forward motion with a small leftward or rightward component. During stimulation, the  
607 animal was required to maintain fixation on a central point within a 3° × 3° window. At  
608 the end of the trial (after a 300ms delay period beyond the end of the stimulus), the  
609 monkeys needed to make a saccade to one of two choice targets (located 5° to the  
610 left and right of the central fixation point) to report their perceived motion as leftward or  
611 rightward relative to straight ahead. The saccade endpoint had to remain within 2.5° of  
612 the target for at least 150 ms to be considered a valid choice. Correct responses were  
613 rewarded with a drop of liquid.

614 To elicit recalibration, we used a similar unsupervised cue-conflict recalibration

615 protocol previously tested behaviorally in humans and monkeys (Zaidel *et al.*, 2011).

616 Each experimental session consisted of three consecutive blocks, as described here  
617 below.

618 **Pre-recalibration block.** This block was used to deduce the baseline  
619 performance (psychometric curve) of each modality for the monkeys, thus only a  
620 single cue (vestibular-only or visual-only) stimulus was presented (**Fig. 1A**). Across  
621 trials, the heading angle was varied in small steps around straight ahead. Ten  
622 logarithmically spaced heading angles were tested for each monkey ( $\pm 16^\circ$ ,  $\pm 8^\circ$ ,  $\pm 4^\circ$ ,  
623  $\pm 2^\circ$ , and  $\pm 1^\circ$ ). To get monkeys accustomed to not getting a reward for all the trials, we  
624 rewarded the monkeys with a 95% probability for correct choices and didn't reward  
625 them for incorrect choices.

626 **Recalibration block.** Only combined vestibular-visual cues were presented in  
627 this block (**Fig. 1B**). There was a discrepancy ( $\Delta$ ) between the vestibular and visual  
628 cues, which was introduced gradually from  $\pm 2^\circ$  to  $\pm 10^\circ$  with steps of  $2^\circ$ , and then  
629 held at  $\pm 10^\circ$  for the rest of the block. This gradual introduction was designed to  
630 prevent monkeys from realizing the discrepancy. The sign of  $\Delta$  represents the  
631 orientation of discrepancy: positive  $\Delta$  (i.e.  $\Delta^+$ ) indicates vestibular cue to the right and  
632 visual cue to the left, and vice versa for negative  $\Delta$  (i.e.  $\Delta^-$ ). Every session used only  
633 one sign, positive or negative. The combined cue heading was defined as the  
634 midpoint between the vestibular and visual headings, such that each (vestibular/visual)  
635 heading was offset to the right and left (or left and right) in relation to the combined  
636 heading. The same ten heading angles as in the pre-recalibration block were used.

637 Unlike the pre-recalibration block, monkeys only needed to maintain fixation on the  
638 central point during the stimulus presentation and didn't need to make choices at the  
639 end of trials. They were rewarded for all the trials for which they maintained fixation.  
640 7~10 repetitions were run for each  $\Delta$  increment, and an additional 10~16 repetitions  
641 were run for maximum  $\Delta$  ( $\pm 10^\circ$ ).

642 ***Post-recalibration block.*** During this block, performance of the individual  
643 (visual/vestibular) modalities was once again tested using single modality trials (as in  
644 the pre-recalibration block). Responses to these trials were used to measure  
645 recalibration. The single cue trials were interleaved with combined-cue trials (with a  
646  $10^\circ$  discrepancy, like the end of the recalibration block, **Fig. 1C**). The combined cue  
647 trials were interleaved to maintain the recalibration while it was measured (for details,  
648 see Zaidel et al., 2011). To avoid perturbing the recalibrated behavior, we adjusted the  
649 reward probability for single-cue trials as follows: if the single cue heading was of  
650 relatively large magnitude, such that, if it were part of a combined cue trial also the  
651 other cue would lie to the same side (right or left), monkeys were rewarded as in the  
652 pre-recalibration block (95% probability reward for correct choices; no reward for  
653 incorrect choices). If, however, the heading for other modality would have been to the  
654 opposite side, the monkeys were rewarded stochastically (70% reward probability,  
655 regardless of their choices).

### 656 ***Electrophysiological recordings***

657 We recorded extracellular activity from isolated single neurons in areas MSTd,

658 PIVC, and VIP using tungsten microelectrodes (Frederick Haer Company, Bowdoin,  
659 ME, USA; tip diameter  $\sim 3 \mu\text{m}$ ; impedance, 1~2 M $\Omega$  at 1 kHz). The microelectrode was  
660 advanced into the cortex through a transdural guide tube, using a hydraulic microdrive  
661 (Frederick Haer Company). Raw neural signals were amplified, band-pass filtered  
662 (400–5000 Hz), and digitized at 25 kHz using the AlphaOmega system (AlphaOmega  
663 Instruments, Nazareth Illit, Israel). The spike times sorted online along with all  
664 behavioral events were collected with 1 ms resolution using the Tempo system for  
665 offline analysis. If the online sorting was not adequate, offline spike sorting was  
666 performed.

667 The target areas (VIP, PIVC, and MSTd) were identified based on the patterns of  
668 gray and white matter transitions, magnetic resonance imaging (MRI) scans,  
669 stereotaxic coordinates, and physiological response properties as described  
670 previously (MSTd: Gu et al., 2006; PIVC: Chen et al., 2010; VIP: Chen et al., 2011).

## 671 **Data analysis**

672 Data analysis was performed with custom scripts in Matlab R2016a (The  
673 MathWorks, Natick, MA, USA). Psychometric function plots were constructed by  
674 plotting the proportion of “rightward” choices as a function of heading angle and then  
675 fitted with a cumulative Gaussian distribution function using the *psignifit* toolbox for  
676 MATLAB (version 2.5.6). For each experimental session, separate psychometric  
677 functions were constructed for visual and vestibular conditions before and after  
678 recalibration. The psychophysical threshold and point of subjective equality (PSE)

679 were defined as the SD ( $\sigma$ ) and mean ( $\mu$ ), respectively, deduced from the best-fitting  
680 function. The PSE represents the heading angle of equal right/left choice proportion,  
681 i.e., perceived straight ahead, also known as the bias. The vestibular/visual  
682 recalibration effect was calculated for each session by subtracting the PSE value of  
683 the pre-recalibration from that of the post-recalibration PSE.

684       Neuronal heading tuning curves were constructed (pre/post recalibration block  
685 and vestibular/visual cue) by computing the average FR (in units of spikes/s, the  
686 baseline FRs subtracted) for each heading over the stimulus presentation ( $t=0-1s$ ). A  
687 neuron was considered tuned to vestibular or visual cue if the linear regression of FR  
688 vs. heading (over the narrow range  $-16^\circ$  to  $16^\circ$ ) had a significant slope ( $p < 0.05$ ,  
689 Pearson's correlation). When calculating the group effects of recalibration for a  
690 vestibular or visual cue, we only considered cells with significant tuning either pre- or  
691 post-recalibration. This resulted in 49 and 66 (of 118 recorded) VIP neurons tuned to  
692 vestibular and visual cues, respectively (31 of which were tuned to both); 60 (of 160  
693 recorded) PIVC neurons tuned to vestibular cues; 23 and 65 (of 83 recorded) MSTd  
694 neurons tuned to vestibular and visual cues, respectively.

695       To estimate neural recalibration (for comparison to behavioral recalibration) we  
696 constructed neurometric functions (Chen *et al.*, 2013a; Fetsch *et al.*, 2012; Gu *et al.*,  
697 2008; Gu *et al.*, 2007) for the pre-recalibration and post-recalibration data (each  
698 calculated after subtracting the mean baseline firing rate respectively). Specifically,  
699 both the pre-recalibration and post-recalibration data were normalized (z-scored) by  
700 subtracting the pre-recalibration mean response and dividing by the pre-recalibration



701 SD across stimulus repetitions. Then ROC (receiver operating characteristic) analysis  
702 was used to compute the ability of an ideal observer to discriminate between the  
703 z-scored responses (for each heading) and  $0^\circ$  (straight ahead). These ROC values  
704 were fitted with a cumulative Gaussian function (like for behavioral psychometrics),  
705 and neuronal recalibration was measured by the difference in PSE (as done for  
706 behavior).

707 To assess neuronal recalibration at different time points during the stimulus, we  
708 calculated response metrics in 200 ms time windows, starting at stimulus onset, and  
709 shifted in steps of 100 ms. The time index (the center of the window) ranged from  $t =$   
710  $0.1$  s to  $t = 1.2$  s (relative to stimulus onset). This range did not include the saccade,  
711 which could only take place after  $t = 1.3$  s because of the delay period (300ms) that  
712 was at the end of the stimulus.

### 713 ***Partial correlation analysis***

714 To disassociate the unique contributions of heading stimuli and choices to the  
715 neural responses (FRs), we computed Pearson partial correlations between these  
716 variables (for details, see Zaidel et al., 2017; Chen et al., 2021). This produced a  
717 heading partial correlation,  $R_h$ , that captured the linear relationship between firing rate  
718 (FR) and heading (H) given the monkey's choice (C), as well as a choice partial  
719 correlation,  $R_c$ , that captured the relationship between firing rate and choice given the  
720 stimulus heading. Partial correlations were calculated over the entire 1 s stimulus  
721 duration. Positive heading partial correlations indicate that firing rates were greater for

722 rightward than leftward headings (given the choices). Likewise, positive choice partial  
723 correlations indicate that firing rates were greater for choices made to the right than  
724 choices made to the left (given the stimulus headings).

### 725 **Statistical Analysis**

726 To evaluate differences in monkeys' behavior (PSE), heading, or choice partial  
727 correlations, between pre- and post-recalibration, we used paired t-tests. Possible  
728 differences in spontaneous (baseline) firing rates between pre- and post-recalibration  
729 were evaluated using Bayesian paired-samples t-tests ( $BF_{10}$  values). Statistical  
730 analysis was conducted using the open-source statistical software program JASP  
731 (Version 0.16.3).

732 **Acknowledgments:** This work was supported by grants from the “technology innovation  
733 2030--major projects” on brain science and brain-like computing of the Ministry of Science  
734 and Technology of China (No. 2021ZD0202600), the National Basic Research Program of  
735 China (No. 32171034) to A.C., and the ISF-NSFC joint research program to A.C. (No.  
736 32061143003) and A.Z. (No. 3318/20). We thank Prof. Dora Angelaki for the helpful  
737 comments. We are also grateful to Minhu Chen for outstanding computer programming.

### 738 **Competing interests**

739 Authors declare no competing interests.

740 **Data and Code availability statement**

741 The data and analysis code for this study have been uploaded to github and can be

742 found at <https://github.com/FuZengBio/Recalibration>.

743 **Additional files**

744 Supplementary files

745 **References**

- 746 Abdulkarim, Z., Hayatou, Z., and Ehrsson, H.H. (2021). Sustained rubber hand illusion after the  
747 end of visuotactile stimulation with a similar time course for the reduction of subjective ownership  
748 and proprioceptive drift. *Experimental brain research* *239*, 3471-3486.
- 749 Atkins, J.E., Jacobs, R.A., and Knill, D.C. (2003). Experience-dependent visual cue recalibration  
750 based on discrepancies between visual and haptic percepts. *Vision research* *43*, 2603-2613.
- 751 Bertelson, P., and De Gelder, B. (2004). The psychology of multimodal perception. *Crossmodal*  
752 *space and crossmodal attention*, 141-177.
- 753 Botvinick, M., and Cohen, J. (1998). Rubber hands 'feel' touch that eyes see. *Nature* *391*, 756-756.
- 754 Brainard, M.S., and Knudsen, E.I. (1993). Experience-dependent plasticity in the inferior colliculus:  
755 a site for visual calibration of the neural representation of auditory space in the barn owl. *Journal*  
756 *of Neuroscience* *13*, 4589-4608.
- 757 Bremmer, F., Klam, F., Duhamel, J.R., Ben Hamed, S., and Graf, W. (2002). Visual-vestibular  
758 interactive responses in the macaque ventral intraparietal area (VIP). *European Journal of*  
759 *Neuroscience* *16*, 1569-1586.
- 760 Britten, K.H. (2008). Mechanisms of self-motion perception. *Annu. Rev. Neurosci.* *31*, 389-410.
- 761 Britten, K.H., and van Wezel, R.J. (1998). Electrical microstimulation of cortical area MST biases  
762 heading perception in monkeys. *Nature neuroscience* *1*, 59-63.
- 763 Britten, K.H., and Van Wezel, R.J. (2002). Area MST and heading perception in macaque monkeys.  
764 *Cerebral cortex* *12*, 692-701.
- 765 Burge, J., Ernst, M.O., and Banks, M.S. (2008). The statistical determinants of adaptation rate in  
766 human reaching. *Journal of vision* *8*, 20-20.

- 767 Burge, J., Girshick, A.R., and Banks, M.S. (2010). Visual–haptic adaptation is determined by relative  
768 reliability. *Journal of Neuroscience* *30*, 7714–7721.
- 769 Bush, G., Luu, P., and Posner, M.I. (2000). Cognitive and emotional influences in anterior cingulate  
770 cortex. *Trends in cognitive sciences* *4*, 215–222.
- 771 Butler, J.S., Campos, J.L., and Bühlhoff, H.H. (2015). Optimal visual–vestibular integration under  
772 conditions of conflicting intersensory motion profiles. *Experimental brain research* *233*, 587–597.
- 773 Butler, J.S., Smith, S.T., Campos, J.L., and Bühlhoff, H.H. (2010). Bayesian integration of visual and  
774 vestibular signals for heading. *Journal of vision* *10*, 23–23.
- 775 Canon, L.K. (1970). Intermodality inconsistency of input and directed attention as determinants of  
776 the nature of adaptation. *Journal of experimental psychology* *84*, 141.
- 777 Chen, A., DeAngelis, G.C., and Angelaki, D.E. (2010). Macaque parieto-insular vestibular cortex:  
778 responses to self-motion and optic flow. *Journal of Neuroscience* *30*, 3022–3042.
- 779 Chen, A., DeAngelis, G.C., and Angelaki, D.E. (2011a). A comparison of vestibular spatiotemporal  
780 tuning in macaque parietoinsular vestibular cortex, ventral intraparietal area, and medial superior  
781 temporal area. *Journal of Neuroscience* *31*, 3082–3094.
- 782 Chen, A., DeAngelis, G.C., and Angelaki, D.E. (2011b). Representation of vestibular and visual cues  
783 to self-motion in ventral intraparietal cortex. *Journal of Neuroscience* *31*, 12036–12052.
- 784 Chen, A., DeAngelis, G.C., and Angelaki, D.E. (2013a). Functional specializations of the ventral  
785 intraparietal area for multisensory heading discrimination. *Journal of Neuroscience* *33*,  
786 3567–3581.
- 787 Chen, A., Gu, Y., Liu, S., DeAngelis, G.C., and Angelaki, D.E. (2016). Evidence for a causal  
788 contribution of macaque vestibular, but not intraparietal, cortex to heading perception. *Journal of*

- 789 Neuroscience *36*, 3789-3798.
- 790 Chen, A., Zeng, F., DeAngelis, G.C., and Angelaki, D.E. (2021). Dynamics of heading and  
791 choice-related signals in the parieto-insular vestibular cortex of macaque monkeys. *Journal of*  
792 *Neuroscience* *41*, 3254-3265.
- 793 Chen, X., DeAngelis, G.C., and Angelaki, D.E. (2013b). Diverse spatial reference frames of  
794 vestibular signals in parietal cortex. *Neuron* *80*, 1310-1321.
- 795 Chen, X., DeAngelis, G.C., and Angelaki, D.E. (2018). Flexible egocentric and allocentric  
796 representations of heading signals in parietal cortex. *Proceedings of the National Academy of*  
797 *Sciences* *115*, E3305-E3312.
- 798 Colby, C.L., Duhamel, J.-R., and Goldberg, M.E. (1993). Ventral intraparietal area of the macaque:  
799 anatomic location and visual response properties. *Journal of neurophysiology* *69*, 902-914.
- 800 de Winkel, K.N., Weesie, J., Werkhoven, P.J., and Groen, E.L. (2010). Integration of visual and  
801 inertial cues in perceived heading of self-motion. *Journal of vision* *10*, 1-1.
- 802 Dokka, K., DeAngelis, G.C., and Angelaki, D.E. (2015). Multisensory integration of visual and  
803 vestibular signals improves heading discrimination in the presence of a moving object. *Journal of*  
804 *Neuroscience* *35*, 13599-13607.
- 805 Duffy, C.J., and Wurtz, R.H. (1995). Response of monkey MST neurons to optic flow stimuli with  
806 shifted centers of motion. *Journal of Neuroscience* *15*, 5192-5208.
- 807 Duhamel, J.-R., Colby, C.L., and Goldberg, M.E. (1998). Ventral intraparietal area of the macaque:  
808 congruent visual and somatic response properties. *Journal of neurophysiology* *79*, 126-136.
- 809 Ernst, M.O., and Banks, M.S. (2002). Humans integrate visual and haptic information in a  
810 statistically optimal fashion. *Nature* *415*, 429-433.

- 811 Ernst, M.O., and Bühlhoff, H.H. (2004). Merging the senses into a robust percept. *Trends in*  
812 *cognitive sciences* *8*, 162-169.
- 813 Ernst, M.O., and Di Luca, M. (2011). Multisensory perception: from integration to remapping.  
814 *Sensory cue integration*, 224-250.
- 815 Fetsch, C.R., Pouget, A., DeAngelis, G.C., and Angelaki, D.E. (2012). Neural correlates of  
816 reliability-based cue weighting during multisensory integration. *Nature neuroscience* *15*,  
817 146-154.
- 818 Fetsch, C.R., Turner, A.H., DeAngelis, G.C., and Angelaki, D.E. (2009). Dynamic reweighting of  
819 visual and vestibular cues during self-motion perception. *Journal of Neuroscience* *29*,  
820 15601-15612.
- 821 Gu, Y. (2018). Vestibular signals in primate cortex for self-motion perception. *Current opinion in*  
822 *neurobiology* *52*, 10-17.
- 823 Gu, Y., Angelaki, D.E., and DeAngelis, G.C. (2008). Neural correlates of multisensory cue  
824 integration in macaque MSTd. *Nature neuroscience* *11*, 1201-1210.
- 825 Gu, Y., DeAngelis, G.C., and Angelaki, D.E. (2007). A functional link between area MSTd and  
826 heading perception based on vestibular signals. *Nature neuroscience* *10*, 1038-1047.
- 827 Gu, Y., DeAngelis, G.C., and Angelaki, D.E. (2012). Causal links between dorsal medial superior  
828 temporal area neurons and multisensory heading perception. *Journal of Neuroscience* *32*,  
829 2299-2313.
- 830 Gu, Y., Watkins, P.V., Angelaki, D.E., and DeAngelis, G.C. (2006). Visual and nonvisual contributions  
831 to three-dimensional heading selectivity in the medial superior temporal area. *Journal of*  
832 *Neuroscience* *26*, 73-85.

- 833 Held, R. (1961). Sensory deprivation: Facts in search of a theory. Exposure-history as a factor in  
834 maintaining stability of perception and coordination. *Journal of Nervous and Mental disease*.
- 835 Holroyd, C.B., and Coles, M.G. (2002). The neural basis of human error processing: reinforcement  
836 learning, dopamine, and the error-related negativity. *Psychological review* *109*, 679.
- 837 Kennett, S., Taylor-Clarke, M., and Haggard, P. (2001). Noninformative vision improves the spatial  
838 resolution of touch in humans. *Current Biology* *11*, 1188-1191.
- 839 Knudsen, E.I. (2002). Instructed learning in the auditory localization pathway of the barn owl.  
840 *Nature* *417*, 322-328.
- 841 Knudsen, E.I., and Brainard, M.S. (1991). Visual instruction of the neural map of auditory space in  
842 the developing optic tectum. *Science* *253*, 85-87.
- 843 Kramer, A., Röder, B., and Bruns, P. (2020). Feedback modulates audio-visual spatial recalibration.  
844 *Frontiers in integrative neuroscience* *13*, 74.
- 845 Lewald, J. (2002). Rapid adaptation to auditory-visual spatial disparity. *Learning & Memory* *9*,  
846 268-278.
- 847 Linkenhoker, B.A., and Knudsen, E.I. (2002). Incremental training increases the plasticity of the  
848 auditory space map in adult barn owls. *Nature* *419*, 293-296.
- 849 Markov, D.A., Petrucco, L., Kist, A.M., and Portugues, R. (2021). A cerebellar internal model  
850 calibrates a feedback controller involved in sensorimotor control. *Nature communications* *12*,  
851 1-21.
- 852 Maunsell, J., and van Essen, D.C. (1983). The connections of the middle temporal visual area (MT)  
853 and their relationship to a cortical hierarchy in the macaque monkey. *Journal of Neuroscience* *3*,  
854 2563-2586.



- 855 Oman, C.M. (1990). Motion sickness: a synthesis and evaluation of the sensory conflict theory.  
856 *Canadian journal of physiology and pharmacology* *68*, 294-303.
- 857 Park, H., and Kayser, C. (2021). The neurophysiological basis of the trial-wise and cumulative  
858 ventriloquism aftereffects. *Journal of Neuroscience* *41*, 1068-1079.
- 859 Radeau, M., and Bertelson, P. (1974). The after-effects of ventriloquism. *The Quarterly journal of*  
860 *experimental psychology* *26*, 63-71.
- 861 Reason, J.T., and Brand, J.J. (1975). *Motion sickness* (Academic press).
- 862 Recanzone, G.H. (1998). Rapidly induced auditory plasticity: the ventriloquism aftereffect.  
863 *Proceedings of the National Academy of Sciences* *95*, 869-875.
- 864 Rock, I., and Victor, J. (1964). Vision and touch: An experimentally created conflict between the  
865 two senses. *Science* *143*, 594-596.
- 866 Rondi-Reig, L., Paradis, A.-L., Lefort, J.M., Babayan, B.M., and Tobin, C. (2014). How the  
867 cerebellum may monitor sensory information for spatial representation. *Frontiers in systems*  
868 *neuroscience* *8*, 205.
- 869 Schlack, A., Hoffmann, K.P., and Bremmer, F. (2002). Interaction of linear vestibular and visual  
870 stimulation in the macaque ventral intraparietal area (VIP). *European Journal of Neuroscience* *16*,  
871 1877-1886.
- 872 Schlack, A., Sterbing-D'Angelo, S.J., Hartung, K., Hoffmann, K.-P., and Bremmer, F. (2005).  
873 Multisensory space representations in the macaque ventral intraparietal area. *Journal of*  
874 *Neuroscience* *25*, 4616-4625.
- 875 Schroeder, C.E., and Foxe, J.J. (2002). The timing and laminar profile of converging inputs to  
876 multisensory areas of the macaque neocortex. *Cognitive Brain Research* *14*, 187-198.

- 877 Shupak, A., and Gordon, C.R. (2006). Motion sickness: advances in pathogenesis, prediction,  
878 prevention, and treatment. *Aviation, space, and environmental medicine* *77*, 1213-1223.
- 879 Stein, B.E., Stanford, T.R., and Rowland, B.A. (2014). Development of multisensory integration  
880 from the perspective of the individual neuron. *Nature Reviews Neuroscience* *15*, 520-535.
- 881 Thériault, R., Landry, M., and Raz, A. (2022). The Rubber Hand Illusion: Top-down attention  
882 modulates embodiment. *Quarterly Journal of Experimental Psychology*, 17470218221078858.
- 883 Tsakiris, M., and Haggard, P. (2005). The rubber hand illusion revisited: visuotactile integration  
884 and self-attribution. *Journal of experimental psychology: Human perception and performance* *31*,  
885 80.
- 886 Ungerleider, L.G., and Desimone, R. (1986). Cortical connections of visual area MT in the macaque.  
887 *Journal of Comparative Neurology* *248*, 190-222.
- 888 van Beers, R.J., Wolpert, D.M., and Haggard, P. (2002). When feeling is more important than  
889 seeing in sensorimotor adaptation. *Current biology* *12*, 834-837.
- 890 Warren, W.H., Morris, M.W., and Kalish, M. (1988). Perception of translational heading from  
891 optical flow. *Journal of Experimental Psychology: Human Perception and Performance* *14*, 646.
- 892 Watson, D.M., Akeroyd, M.A., Roach, N.W., and Webb, B.S. (2021). Multiple spatial reference  
893 frames underpin perceptual recalibration to audio-visual discrepancies. *PLoS one* *16*, e0251827.
- 894 Webster, M.A. (2012). Evolving concepts of sensory adaptation. *F1000 biology reports* *4*.
- 895 Wurtz, R.H., and Duffy, C.J. (1992). Neuronal correlates of optic flow stimulation. *Annals of the*  
896 *New York Academy of Sciences* *656*, 205-219.
- 897 Yu, X., and Gu, Y. (2018). Probing sensory readout via combined choice-correlation measures and  
898 microstimulation perturbation. *Neuron* *100*, 715-727. e715.

- 899 Zaidel, A., DeAngelis, G.C., and Angelaki, D.E. (2017). Decoupled choice-driven and  
900 stimulus-related activity in parietal neurons may be misrepresented by choice probabilities.  
901 Nature Communications *8*, 1-13.
- 902 Zaidel, A., Laurens, J., DeAngelis, G.C., and Angelaki, D.E. (2021). Supervised multisensory  
903 calibration signals are evident in VIP but not MSTd. Journal of Neuroscience *41*, 10108-10119.
- 904 Zaidel, A., Ma, W.J., and Angelaki, D.E. (2013). Supervised calibration relies on the multisensory  
905 percept. Neuron *80*, 1544-1557.
- 906 Zaidel, A., Turner, A.H., and Angelaki, D.E. (2011). Multisensory calibration is independent of cue  
907 reliability. Journal of Neuroscience *31*, 13949-13962.
- 908 Zhang, T., Heuer, H.W., and Britten, K.H. (2004). Parietal area VIP neuronal responses to heading  
909 stimuli are encoded in head-centered coordinates. Neuron *42*, 993-1001.
- 910 Zhao, B., Zhang, Y., and Chen, A. (2021). Encoding of vestibular and optic flow cues to self-  
911 motion in the posterior superior temporal polysensory area. The Journal of Physiology *599*,  
912 3937-3954.
- 913 Zierul, B., Röder, B., Tempelmann, C., Bruns, P., and Noesselt, T. (2017). The role of auditory cortex  
914 in the spatial ventriloquism aftereffect. NeuroImage *162*, 257-268.

## Supplementary Material

### Contrary neuronal recalibration in different multisensory cortical areas

Fu Zeng<sup>1</sup>, Adam Zaidel<sup>2, \*</sup> and Aihua Chen<sup>1, \*</sup>

1. Key Laboratory of Brain Functional Genomics (Ministry of Education), East China Normal University, 3663 Zhongshan Road N., Shanghai 200062, China
2. Gonda Multidisciplinary Brain Research Center, Bar-Ilan University, Ramat Gan, 5290002, Israel

\* Co-corresponding author: [ahchen@brain.ecnu.edu.cn](mailto:ahchen@brain.ecnu.edu.cn) (A.C.) or [adam.zaidel@biu.ac.il](mailto:adam.zaidel@biu.ac.il) (A.Z.)

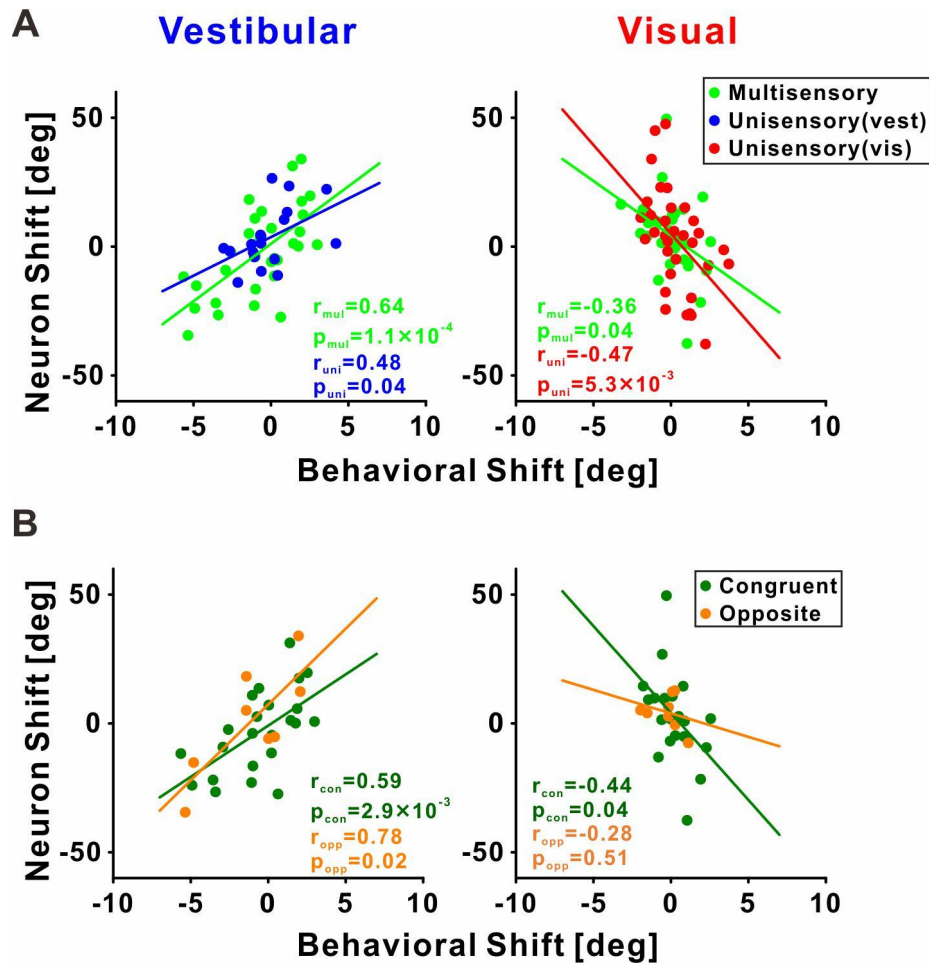

**Supplemental Figure 1. Neuronal vs. behavioral shifts by neuron type in area VIP.** (A) Neurons with multisensory (green) and unisensory (blue and red, for vestibular and visual, respectively) tuning. (B) Multisensory neurons with congruent, or opposite, vestibular and visual tuning. The neuronal shifts were positively correlated with the behavioral shifts for the vestibular cue (left column), and negatively correlated with the behavioral shifts for the visual cue (right column). Pearson correlation coefficients are presented on the corresponding plots.

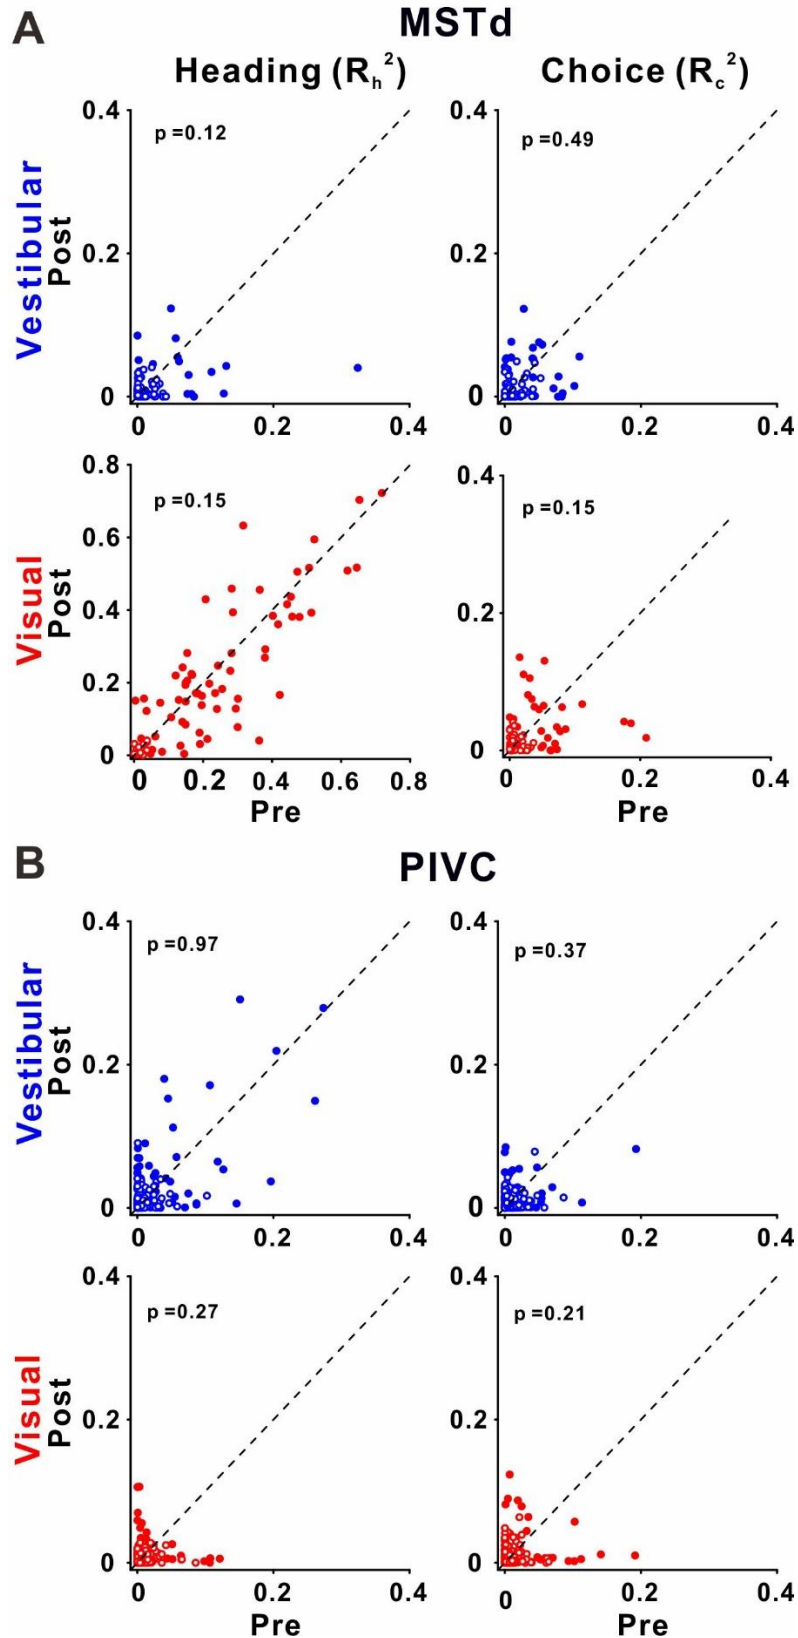

Supplemental Figure 2. Choice and heading partial correlations in areas MSTd and PIVC. Plotting conventions are the same as in Figure 8.

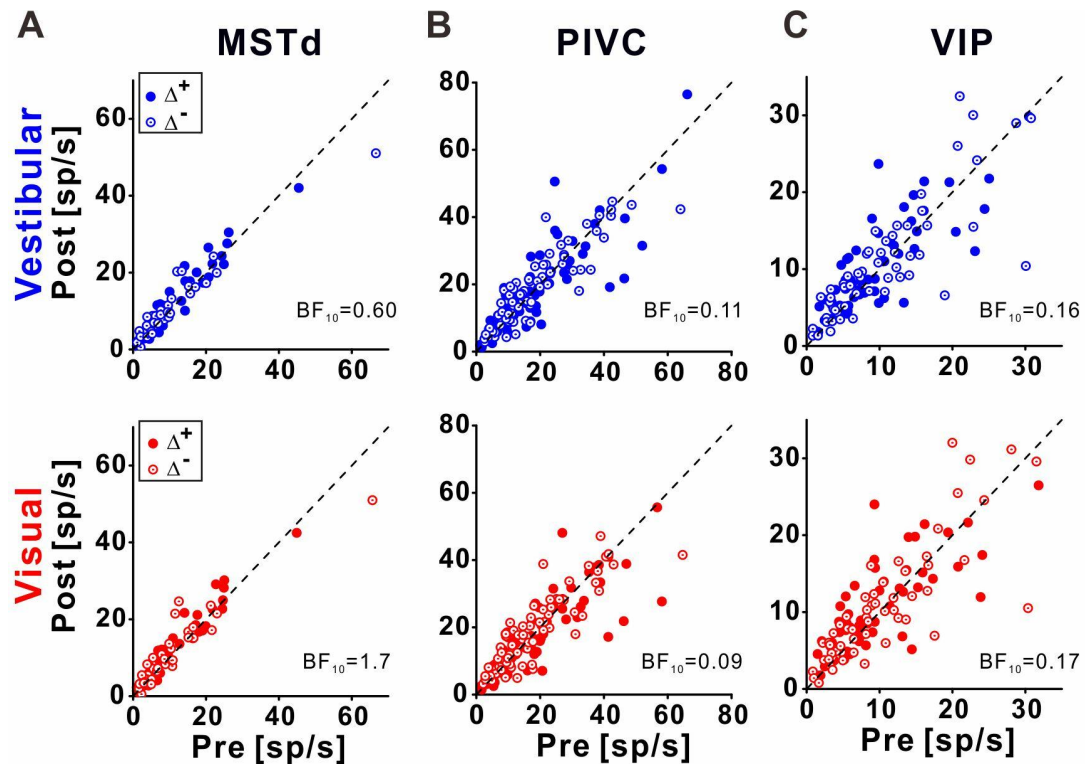

**Supplemental Figure 3. Baseline firing rates in areas MSTd, PIVC and VIP.** The baseline firing rates post- vs. pre-recalibration are plotted for vestibular (upper panel) and visual (bottom panel) cues. Solid symbols represent  $\Delta^+$  and open symbols represent  $\Delta^-$ . Bayes factors ( $BF_{10}$ )  $< \frac{1}{3}$  (as for PIVC and VIP) provide substantial evidence against a change in baseline firing rates. Bayes factors between  $\frac{1}{3}$  and 3 (as for MSTd) are inconclusive (provide no substantial evidence for, or against, changes).
